# Scarless engineering of the *Drosophila* genome near any site-specific integration site

Siqian Feng<sup>1,2,\*</sup>, Shan Lu<sup>2,3</sup>, Wesley B. Grueber<sup>2,4,5</sup>, and Richard S. Mann<sup>1,2,6,\*</sup>

<sup>1</sup>Department of Biochemistry and Molecular Biophysics

<sup>2</sup>Mortimer B. Zuckerman Mind Brain Behavior Institute

<sup>3</sup>Department of Biological Sciences

<sup>4</sup>Department of Neuroscience

<sup>5</sup>Department of Physiology and Cellular Biophysics

<sup>6</sup>Department of Systems Biology

Columbia University, New York, New York, USA

\*For correspondence: [sf2607@columbia.edu](mailto:sf2607@columbia.edu) (SF) and [rsm10@columbia.edu](mailto:rsm10@columbia.edu) (RSM)

## 26 **Abstract**

27 We describe a simple and efficient technique that allows scarless engineering of *Drosophila* genomic  
28 sequences near any landing site containing an inverted attP cassette, such as a *MiMIC* insertion. This  
29 2-step method combines phiC31 integrase mediated site-specific integration and homing nuclease-  
30 mediated resolution of local duplications, efficiently converting the original landing site allele to  
31 modified alleles that only have the desired change(s). Dominant markers incorporated into this  
32 method allow correct individual flies to be efficiently identified at each step. In principle, single attP  
33 sites and FRT sites are also valid landing sites. Given the large and increasing number of landing site  
34 lines available in the fly community, this method provides an easy and fast way to efficiently edit the  
35 majority of the *Drosophila* genome in a scarless manner. This technique should also be applicable to  
36 other species.

## 38 **Introduction**

39 Reverse genetics is a powerful tool to study the functions of genes and proteins. To answer many  
40 important biological questions, it is necessary to make precise genomic changes at the base pair  
41 resolution, preferably in a scarless manner, such that the final alleles only have the desired  
42 mutation(s). It is therefore important to have simple and efficient techniques for scarless genome  
43 engineering.

44 The fruit fly *Drosophila melanogaster* is well known for its superior genetic tool kit. There have been  
45 many efforts to precisely engineer the *Drosophila* genome. The first successful attempt used so-  
46 called ends-in targeting by homologous recombination to generate a local duplication, followed by  
47 homing nuclease-mediated resolution of the duplication (Rong et al., 2002). The final mutant alleles  
48 are scarless, but because of the low efficiency of ends-in targeting, large scale screening of  
49 thousands of vials is necessary to identify the successful targeting events. A variant technique called  
50 SIRT (Site-specific Integrase mediated Repeated Targeting) is suitable for generating multiple  
51 different mutant alleles of the same locus (Gao et al., 2008). It involves an initial labor-intensive ends-  
52 in targeting step to insert an attP site near the locus of interest, but all subsequent mutagenesis uses  
53 highly efficient phiC31 integrase mediated site-specific integration and homing nuclease-mediated  
54 resolution of the duplication. The final alleles generated by SIRT still have an attR scar.

55 RMCE (recombinase mediated cassette exchange) (Bateman et al., 2006) based techniques  
56 represent a different strategy (Delker et al., 2019). In these approaches, the wild type locus is first  
57 replaced by an inverted attP cassette, two attP sites in the opposite orientation flanking a dominant

58 marker. This is usually achieved by homologous recombination induced by cutting with a custom  
59 endonuclease such as ZFN, TALENs, or CRISPR. Next, phiC31 integrase mediated RMCE is used to  
60 replace the dominant marker with a mutant version of the genomic sequence. RMCE based  
61 techniques are relatively straightforward to perform and highly efficient, but the final alleles have two  
62 attR scars flanking the modifications.

63 Most recently, the CRISPR revolution has made the precise engineering of the animal genomes  
64 significantly easier. In *Drosophila*, to facilitate the identification of correctly engineered individuals, a  
65 dominant marker is often inserted into the genome as the wild type sequence is converted into the  
66 mutant sequence during CRISPR-mediated homologous recombination (Gratz et al., 2014). The  
67 dominant marker can later be removed, but a short scar such as an FRT site or a loxP site, is often  
68 left in the genome, although there are ways to remove the dominant marker in a scarless manner (for  
69 example with piggyBac, <https://flycrispr.org/>). In principal, scarless mutant alleles can also be directly  
70 generated by CRISPR-mediated homologous recombination. However, since most custom mutant  
71 alleles do not have easily observable phenotypes, individuals bearing the desired mutations must be  
72 identified by laborious molecular screening, and when the desired mutation only affects a few base  
73 pairs, or even a single base pair, PCR primers may not be able to distinguish the wild type and  
74 mutant sequences. In addition, a common challenge with CRISPR based experiments is that the  
75 efficiency of the selected gRNA(s) is difficult to predict, and the rate of unsuccessful CRISPR  
76 attempts is not trivial (Kanca et al., 2019). Common strategies to increase gRNA efficiency are to test  
77 them in cell culture before injecting flies, or to generate gRNA expressing transgenic flies (Port et al.,  
78 2015), both of which require additional time and effort.

79 Here, we report a new approach that combines phiC31 integrase mediated RMCE and homing  
80 nuclease mediated resolution of local duplications to scarlessly engineer the *Drosophila* genomic  
81 sequences near any landing site with an inverted attP cassette. In this method, first a properly  
82 marked mutant DNA fragment is integrated into the selected landing site via RMCE. This creates  
83 local duplications on both sides of the integration sites, which are then resolved in a single step by  
84 homing nuclease-induced homologous recombination between the duplications, resulting in scarless  
85 mutant alleles. Previously, there have been some attempts to combine these two procedures for  
86 genome engineering. For example, Zolotarev *et. al.* resolved one side of an RMCE allele in a scarless  
87 manner, while the other side still had a scar (Zolotarev et al., 2019). Vilain *et. al.* resolved the two  
88 sides one at a time to make scarless alleles, but this method did not include any visible marker, and  
89 relied entirely on molecular methods to identify the desired mutation (Vilain et al., 2014). To our  
90 knowledge, there have been no reports describing the simultaneous resolution of both sides after  
91 RMCE, which significantly shortens the time required to generate the final scarless allele. Once an

92 RMCE line has been generated, our method takes less than two months to obtain a final scarless  
93 allele.

94 Because of the large number of fly lines with inverted attP cassettes, a significant portion of the  
95 *Drosophila* genome is accessible with this technique. There are about 17,500 *MiMIC* insertion lines  
96 (Lee et al., 2018, Nagarkar-Jaiswal et al., 2015, Venken et al., 2011), and 7441 have been mapped.  
97 The mapped *MiMIC* insertions allow approximately half of the euchromatic *Drosophila* genome to be  
98 efficiently engineered with this method (see Discussion). The fact that single attP sites and FRT sites  
99 are also potential landing sites further expands the accessible portion of the fly genome. phiC31  
100 integrase mediated site-specific recombination, such as RMCE, has been proven to be robust and  
101 efficient, and does not have the risk associated with CRISPR gRNA selection. We show that this  
102 technique can be used to efficiently make precise protein coding mutations as well as large insertions  
103 and deletions. This technique requires no laborious screening and efficiently generates the desired  
104 scarless alleles in a short period of time.

## 106 Results

### 107 Overall strategy

108 **Figure 1** illustrates the overall 2-step strategy of this method, exemplified using a landing site  
109 containing an inverted attP cassette, such as a *MiMIC* (Nagarkar-Jaiswal et al., 2015, Venken et al.,  
110 2011) or CRIMIC insertion (Lee et al., 2018). First, a fragment from the targeting plasmid is integrated  
111 into the selected landing site via RMCE. This fragment contains the desired mutation(s), and is  
112 flanked by dominant markers and homing nucleases sites. Second, the homing nucleases are  
113 expressed, and the resulting dsDNA breaks induce homologous recombination between the  
114 integrated mutant sequence and the original genomic sequences, thus resolving the locus to scarless  
115 mutant alleles. Alternatively, the two sides can be resolved sequentially (**Figure 1-figure supplement**  
116 **1**). In each step, desired individuals are identified by the presence or absence of dominant markers,  
117 which greatly simplifies the screening process. Importantly, the final alleles only have the desired  
118 mutation(s), with no additional modifications.

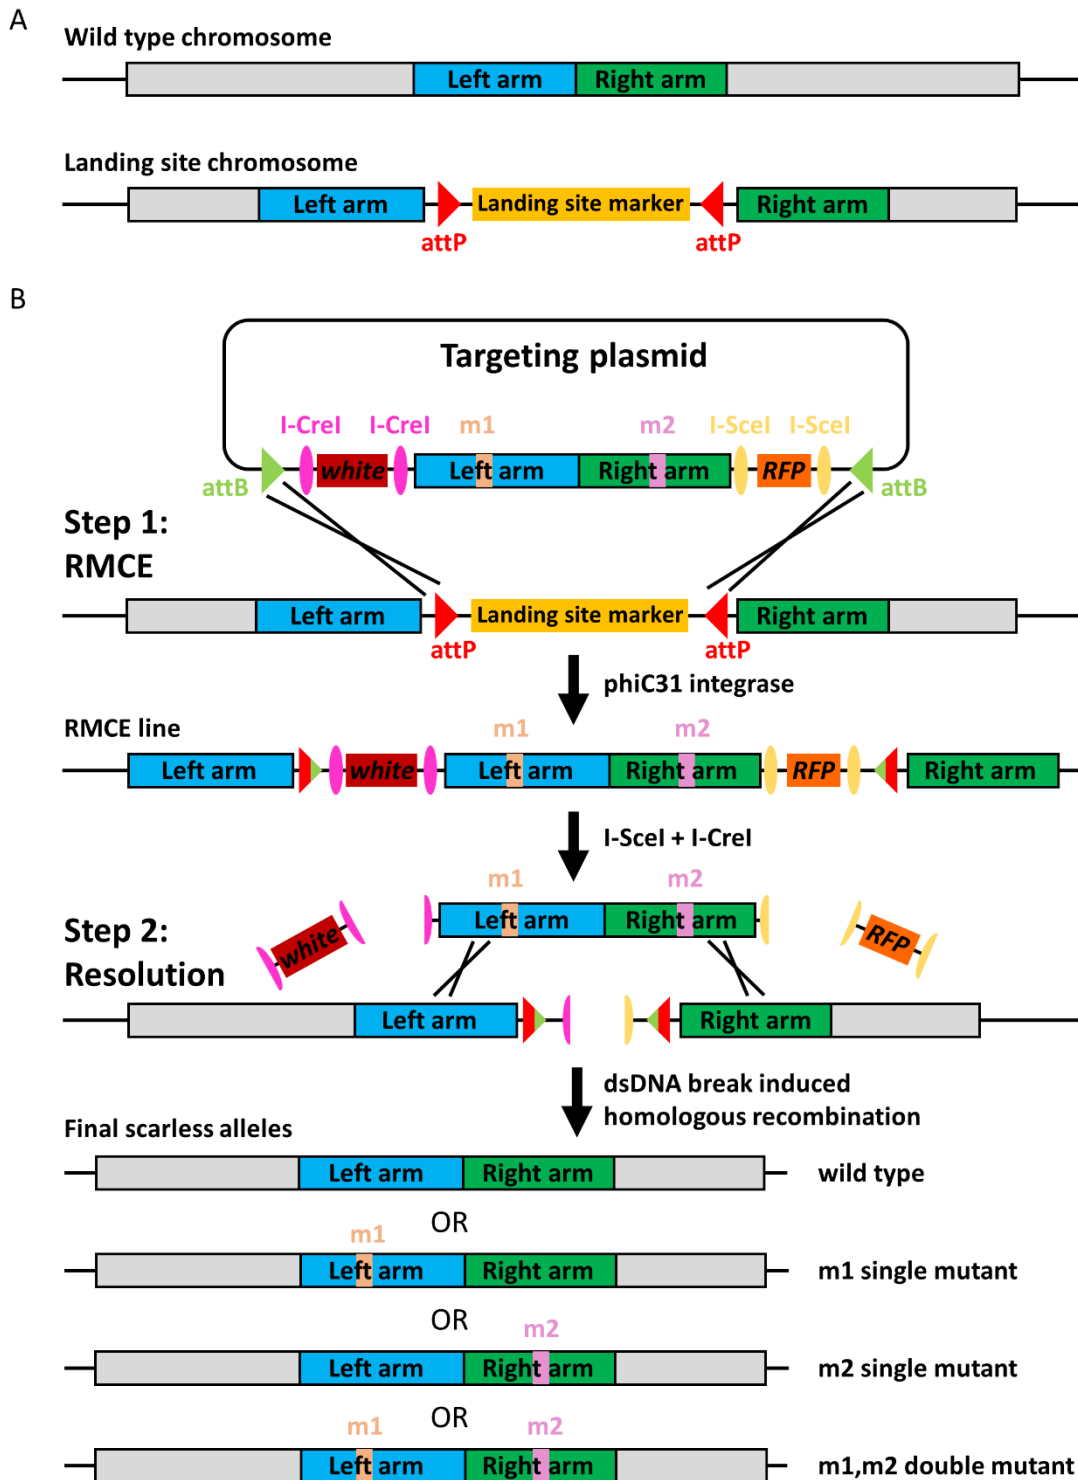

123

124 **Figure 1. Overall strategy of the genome editing method.**

125 **A.** Schematics showing the wild type chromosome and the landing site chromosome.

126 **B.** Schematic that details the 2-step genome editing strategy. In step 1, a properly marked DNA fragment with the desired  
 127 mutation(s) is integrated near the locus of interest. In step 2, homologous recombination induced by homing nuclease  
 128 generated dsDNA breaks resolves the local duplications, and generates the final scarless mutant alleles.

129 Test of principle: engineering of the *Antp* locus by sequential resolution

130 The *Hox* gene *Antennapedia* (*Antp*) was selected for an initial test of this technique. There is a *MiMIC*  
131 insertion (*Antp*<sup>*Mi02272*</sup>) in the intron between the first coding exon and the small second coding exon,  
132 where the so-called W-motif is located (Figure 2A) (Merabet and Mann, 2016). The W-motif, also  
133 called the hexapeptide, is a protein-protein interaction motif present in nearly all Hox proteins that  
134 mediates the interaction between Hox proteins and their shared cofactor, the TALE family  
135 homeodomain protein (Extradenticle (Exd) in *Drosophila* and Pbx in vertebrates) (Mann et al., 2009).  
136 Although the functions of the W-motif have been extensively studied, most *in vivo* experiments rely on  
137 ectopic expression of mutant Hox proteins (Merabet and Mann, 2016). Therefore, this motif  
138 represents an interesting target for *in vivo* genome engineering.

139 The *Antp*<sup>*Mi02272*</sup> *MiMIC* insertion is 1150 bp downstream of the ATG start codon, and 250 bp upstream  
140 of the W-motif codons (Figure 2A). Our goals were to insert a short 3xFLAG tag at the N terminus of  
141 the *Antp* protein and to mutate the W-motif from YPWM to AAAA (4 alanines) (Figure 2C). To  
142 generate the targeting plasmid, a 7.8 kb genomic fragment flanking the *MiMIC* insertion site, which  
143 had the N terminal 3xFLAG tag and the YPWM->AAAA mutation, was cloned into the optimized  
144 targeting vector, which contains the required markers and homing endonuclease sites (Figure 2B and  
145 Figure 1-figure supplement 2). This targeting plasmid was injected into the F1 embryos of the cross  
146 between the *MiMIC* males and females from the *vas-int(X)* line, which specifically expresses the  
147 phiC31 integrase in the germline (Bischof et al., 2007) (see Methods for details).

148 Successful RMCE events were identified by the presence of both *mini-white* and *3xP3-RFP* markers,  
149 as well as the simultaneous loss of the *yellow* marker present in the original *MiMIC* insertion. PCR  
150 was performed to determine the orientation of the RMCE lines. The entire targeting plasmid was  
151 about 20 kb in size, and a 17 kb fragment was integrated into the genome through RMCE. Despite  
152 the large size, multiple independent RMCE lines with the correct orientation were readily obtained.  
153 Due to the presence of insulators with repetitive sequences (see Figure 1-figure supplement 2 and  
154 Materials and Methods), Southern blot analysis was performed to ensure there were no unwanted  
155 rearrangements (Figure 2-figure supplement 1). One fully verified RMCE line was selected for the  
156 next resolution step.

157

158

159

160

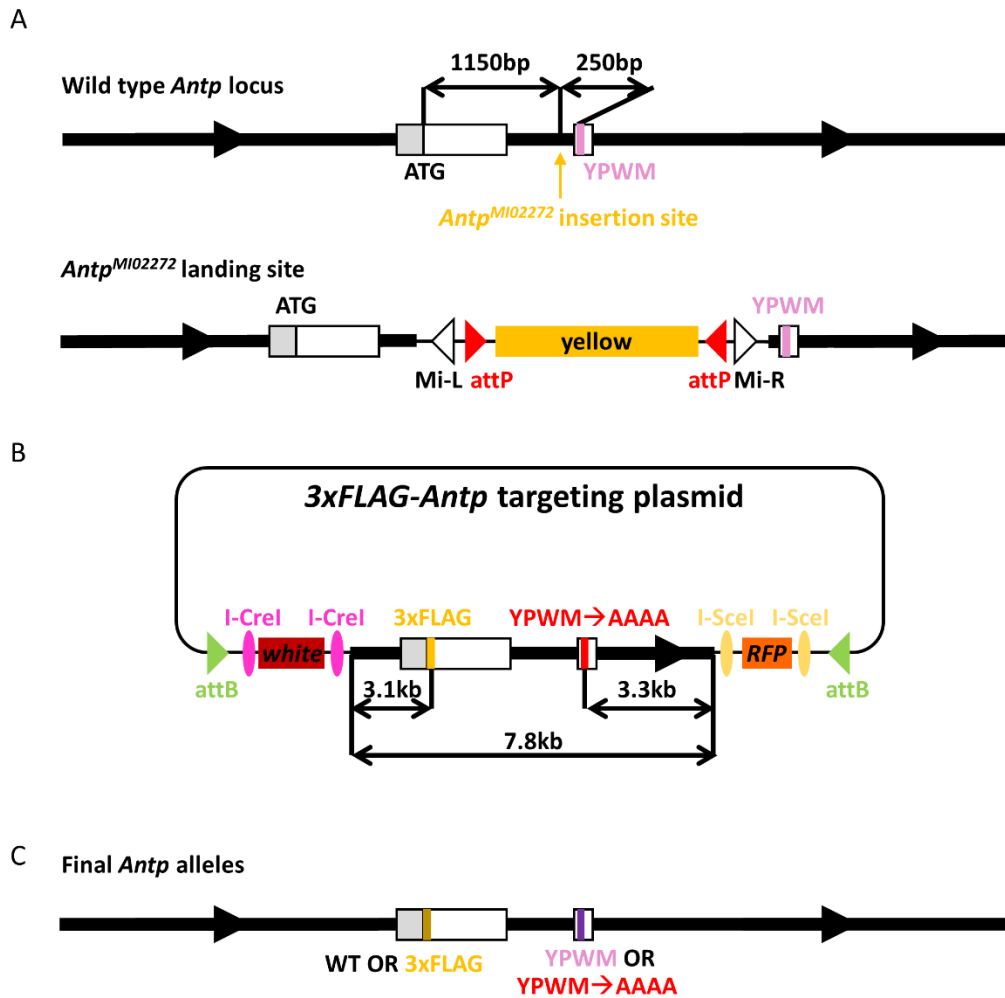

161

162 **Figure 2. Scarless engineering of the *Antp* locus.**

163 **A.** The wild type *Antp* locus and the *Antp*<sup>M102272</sup> MiMIC landing site. The thick black lines denote introns and the arrows  
164 indicate the direction of transcription. The white boxes are coding exons, and the gray box shows part of the 5' UTR. The  
165 ATG start codon and the sequence encoding the W-motif, as well as their distances to the MiMIC insertion site, are  
166 indicated.

167 **B.** The *Antp* targeting plasmid. The total length of the integrated fragment, as well as the relative positions of the two  
168 desired mutations, are shown.

169 **C.** The final scarless alleles. The schematics in this figure are not drawn to scale.

170

171

172

173

174 Prior to testing the simultaneous resolution of both sides, we first tested the sequential resolution of  
175 each side (Figure 1-figure supplement 1). The right side was resolved first by expressing the homing  
176 endonuclease I-SceI (Figure 3A), which has an 18 bp recognition site that is not present in the  
177 *Drosophila* genome (Bellaïche et al., 1999). The *hs-I-SceI* flies were crossed to the RMCE flies (cross  
178 I) (Figure 3A), and their F1 embryos/larvae were heat-shocked at 37°C for 1 hour to induce I-SceI  
179 expression. 100 F1 adult males were then individually crossed to a balancer stock (cross II) (Figure  
180 3A). Every fertile cross II produced at least one male progeny that had lost the *3xP3-RFP* marker,  
181 suggesting a high efficiency. To ensure all resolved lines were independent, only one male that lost  
182 *3xP3-RFP* from each individual cross II was selected to generate a stock (cross III) (Figure 3A).

183 In total, 94 independent right side-resolved lines were obtained, and 60 lines were randomly selected  
184 for Southern blot analysis. 41/60 lines showed the expected pattern of a successful resolution. The  
185 patterns of 18 of the other 19 lines were consistent with a marker deletion event induced by two  
186 double stranded DNA breaks flanking the *3xP3-RFP* marker (Figure 3B and Figure 3-figure  
187 supplement 1). Out of the 41 successfully resolved lines, 38 had the YPWM->AAAA mutation, and 3  
188 were wild type, as determined by genotype-specific PCR. The DNA sequence encoding the  
189 YPWM->AAAA mutation is 250 bp from the *MiMIC* insertion site and about 3300 bp from the end of  
190 the right homologous arm (Figure 2A and 2B). Remarkably, the 3:38 observed wild type to mutant  
191 ratio is very close to expectations ( $250:3300 \approx 3:40$ ) if recombination is evenly distributed across the  
192 homology arm. Finally, we sequenced 2 wild type and 2 mutant alleles between the *MiMIC* insertion  
193 site and the end of the right homologous arm, and confirmed that no unwanted mutations were  
194 introduced.

195 Next, from fully verified right-side resolved lines, one wild type line and one mutant line were selected  
196 for left side resolution by I-CreI. The overall resolution strategy and crosses were essentially the  
197 same as for the right-side resolution (Figure 3C). I-CreI has endogenous target sites in the 28S rRNA  
198 gene in the heterochromatic regions on X and Y chromosomes (Rong et al., 2002), thus prolonged  
199 expression causes high rates of lethality and sterility. To reduce the toxicity of I-CreI, the heat shock  
200 was performed for 40 minutes at 37°C. Under such conditions, a mild reduction in fertility was  
201 observed in cross IIs, but each fertile cross II still produced at least one *w-* male. A slight reduction in  
202 fertility was also seen in cross IIIs (Figure 3D).

203 10 fully resolved wild type lines and 20 fully resolved mutant lines were selected for further  
204 characterization. PCR was used to determine if the 3xFLAG tag was present, and to eliminate any  
205 marker deletion lines from further characterization. 60% of the resolved lines had the 3xFLAG tag  
206 (Figure 3D), which was close to the expected ratio (~70%) based on the relative position of the ATG



207 start codon in the integrated fragment (Figure 2A and 2B). 5 independent *3xFLAG-Antp* alleles, 4  
208 independent *Antp*(YPWM->AAAA) alleles, and 7 independent *3xFLAG-Antp*(YPWM->AAAA) alleles  
209 were selected for Southern blot verification, and all gave the expected patterns (Figure 3-figure  
210 supplement 2).

211 One noteworthy finding was that marker deletion events were not observed during left side resolution,  
212 either by PCR or by Southern blot, in contrast to right side resolution. Detailed inspection of the  
213 targeting vector revealed that the two I-SceI sites flanking the right side *3xP3-RFP* marker were in the  
214 same orientation, such that the single stranded overhangs generated by I-SceI were compatible, thus  
215 facilitating a marker deletion event. In contrast, the two I-CreI sites flanking the left side *mini-white*  
216 marker were in the opposite orientation, thus the single stranded overhangs generated by I-CreI were  
217 not compatible, disfavoring simple marker deletion events.

218

219

220

221

222

223

224

225

226

227

228

229

230

231

232

233

234

### A Crosses for *Antp* right-side resolution

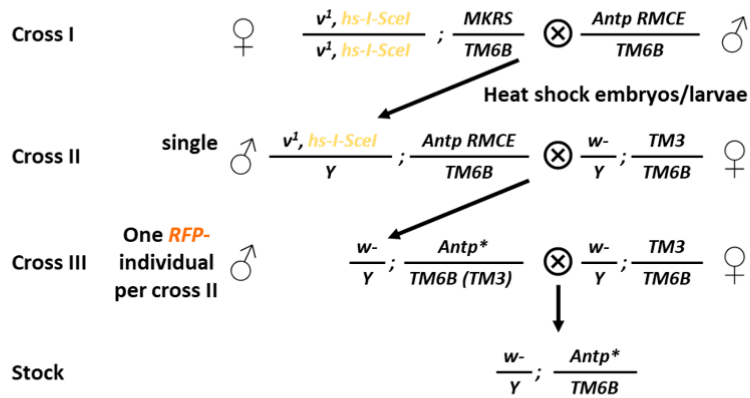

### B

| Cross II total | Cross II fertile (Cross III total) | Cross III fertile (Final alleles) | Southern tested alleles | Correct resolution | Marker deletion |
|----------------|------------------------------------|-----------------------------------|-------------------------|--------------------|-----------------|
| 100            | 99                                 | 94                                | 60                      | 41                 | 18              |

### C Crosses for *Antp* left-side resolution

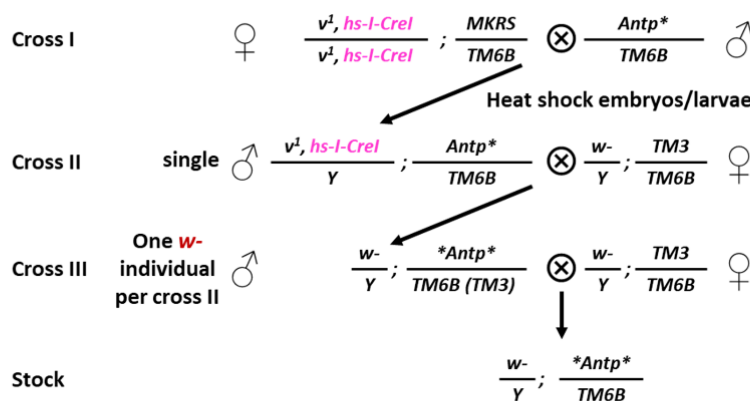

### D

| Right side genotype | Cross II total | Cross II fertile (Cross III total) | Cross III fertile (Final alleles) | Genotyped by PCR | With 3xFLAG | No 3xFLAG |
|---------------------|----------------|------------------------------------|-----------------------------------|------------------|-------------|-----------|
| Wild type           | 25             | 23                                 | 13                                | 10               | 6           | 4         |
| YPWM→AAAA           | 75             | 54                                 | 45                                | 20               | 12          | 8         |
| Total               | 100            | 77                                 | 58                                | 30               | 18          | 12        |

235

236 **Figure 3. Sequential resolution of the 3xFLAG-*Antp* RMCE allele.**

237 **A.** The crosses for I-SceI mediated right-side resolution of the 3xFLAG-*Antp* RMCE allele.

238 **B.** The results of I-SceI mediated right-side resolution. Of the 94 independent final alleles, 60 were randomly selected for  
239 Southern blot analysis.

240 **C.** The crosses for I-CreI mediated left-side resolution.

241 **D.** The results of I-CreI mediated left-side resolution. 30 out of 58 final alleles were genotyped by PCR.

242

## 243 Simultaneous resolution of both sides

244 Next, we tested the simultaneous resolution of both sides, which would significantly simplify and  
245 shorten the entire process (Figure 1B). The overall procedure was similar to left-side or right-side  
246 resolution, except that both I-SceI and I-CreI were expressed together. The simultaneous resolution  
247 crosses for chromosome III targets are shown in Figure 4A, and those for chromosome II and X  
248 targets are shown in Figure 4-figure supplement 1. We tested heat shock at 37°C for 10, 20, 30 and  
249 40 minutes, and found that a 20-minute heat shock gave the highest rate of productive cross II (data  
250 not shown), defined as the fraction of cross IIs that lead to a final stock (see Materials and Methods  
251 for more details).

252 To gain a better measure of the efficiency and robustness of this method, 8 different verified RMCE  
253 lines were subjected to simultaneous resolution (Figure 4B). After a 20-minute heat shock, essentially  
254 normal viability and fertility were observed. On the other hand, not all individual cross IIs generated  
255 male progeny that lost both the *mini-white* and the *3xP3-RFP* markers (Figure 4B); as expected, we  
256 frequently observed cross II progeny that lost either *mini-white* or *3xP3-RFP*, but not both.  
257 Nevertheless, except for one RMCE line (line F), the rate of productive cross II ranged from 50% to  
258 70%, confirming the high efficiency of simultaneous resolution (Figure 4B).

259 We selected the final alleles resolved from 3 different RMCE lines for further characterization. PCR  
260 was first used to genotype the selected alleles. Because *Antp*'s W-motif motif is expected to be  
261 necessary for viability, only the presence of the *3xFLAG* tag was examined for all homozygous viable  
262 final alleles. For selected homozygous lethal alleles, the presence of the *3xFLAG* tag, the  
263 *YPWM->AAAA* mutation, as well as the potential right-side marker deletion were tested (Figure 4C).  
264 We detected some right-side marker deletion events, as expected. One homozygous lethal allele had  
265 the apparent genotype of *3xFLAG-Antp*+. Presumably, an unwanted mutation occurred during  
266 resolution, which caused the observed homozygous lethality. Southern blot was performed on 15  
267 genotyped alleles, and 14 gave the expected patterns (Figure 4-figure supplement 2), confirming the  
268 high accuracy of this technique. Finally, all 14 Southern blot-verified lines were confirmed by  
269 sequencing, and contained no unwanted mutations.

270

271

272

273

274

**A Crosses for simultaneous resolution (chromosome III)**

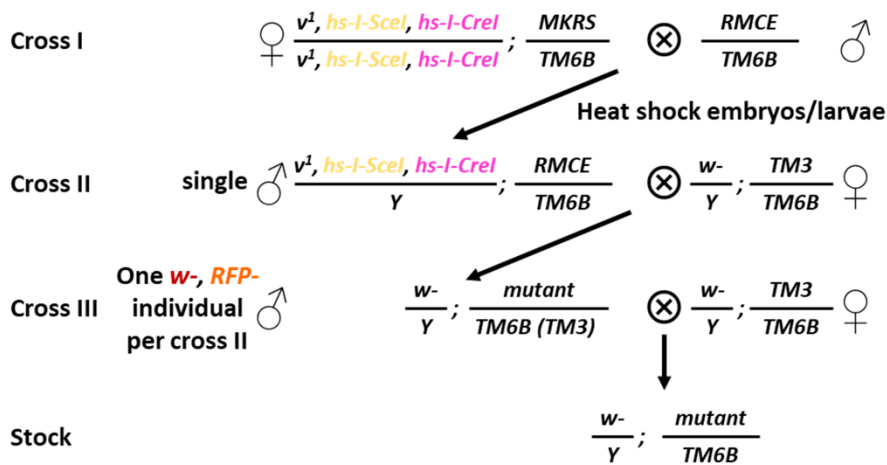

**B**

| Starting RMCE line                | A   | B   | C   | D   | E   | F   | G   | H (opposite) |
|-----------------------------------|-----|-----|-----|-----|-----|-----|-----|--------------|
| Cross II total                    | 50  | 50  | 50  | 50  | 50  | 50  | 50  | 50           |
| Cross II fertile                  | 45  | 47  | 50  | 50  | 47  | 46  | 45  | 49           |
| Cross III total                   | 26  | 30  | 35  | 35  | 39  | 19  | 29  | 40           |
| Cross III fertile (Final alleles) | 25  | 28  | 33  | 35  | 34  | 18  | 28  | 38           |
| Productive cross II               | 50% | 56% | 66% | 70% | 68% | 36% | 56% | 76%          |

**C**

| Starting RMCE line | Homozygous viable alleles |              | Homozygous lethal alleles |                         |                       |                      |               |
|--------------------|---------------------------|--------------|---------------------------|-------------------------|-----------------------|----------------------|---------------|
|                    | WT                        | 3xFLAG -Antp | Antp(YPWM →AAAA)          | 3xFLAG-Antp(YPWM →AAAA) | Right marker deletion | Apparent 3xFLAG-Antp | Not genotyped |
| C                  | 5                         | 4            | 1                         | 2                       | 5                     | 0                    | 16            |
| D                  | 2                         | 4            | 2                         | 4                       | 2                     | 0                    | 21            |
| G                  | 2                         | 1            | 2                         | 4                       | 1                     | 1                    | 17            |
| H(opposite)        | 6                         | 3            | N/D                       |                         |                       |                      | 29            |

275

**Figure 4. Simultaneous resolution of 3xFLAG-Antp RMCE alleles.**

**A.** Crosses for simultaneous resolution of RMCE alleles on chromosome III.

**B.** Results of the simultaneous resolution of 8 independent 3xFLAG-Antp RMCE alleles. RMCE allele H has the opposite integration orientation.

**C.** PCR genotyping results of selected final alleles from 4 starting RMCE alleles. For each genotype, multiple independent alleles were obtained. For RMCE allele H, which has the opposite orientation, only homozygous viable final alleles were genotyped. "N/D" stands for "not determined".

283

284

## 285 RMCE lines with opposite integration orientation can be resolved efficiently

286 The observation that simultaneous resolution works well raised the possibility that successful  
287 resolutions can be obtained even if the original RMCE line was in the opposite orientation, where the  
288 duplicated arms are not adjacent to their endogenous homologous sequences. We considered this  
289 possibility because when both I-SceI and I-CreI are expressed, the entire integrated fragment is  
290 liberated from the chromosome and, in principle, could pair with homologous sequences regardless of  
291 the initial orientation. We tested this with an RMCE line in the opposite orientation (Figure 4B).  
292 Indeed, this line showed a resolution efficiency that was among the highest of all 8 tested RMCE  
293 lines.

294 To confirm the accuracy of the final alleles, we further characterized all 9 homozygous viable alleles  
295 generated from this particular RMCE line. Of these 9 alleles, 3 had the *3xFLAG-Antp* genotype, while  
296 the other 6 were untagged (Figure 4C). We selected 2 of the 3 *3xFLAG-Antp* alleles for further  
297 verification by Southern blotting, and both gave the expected patterns (Figure 4-figure supplement 2).  
298 The sequences of these 2 alleles confirmed that there were no additional mutations.

299

## 300 Precise editing of *Ubx*, another *Hox* gene

301 To test the generality of this method, we engineered another Hox gene, *Ultrabithorax (Ubx)*. We  
302 chose to mutate the canonical W-motif, the YPWM motif, and insert an N terminal 3xFLAG tag  
303 (Figure 5A and 5C). As no landing site insertions were available, we first inserted an inverted attP  
304 cassette marked with *ubi-DsRed* (Handler and Harrell, 2001) into the *Ubx* locus, using a pair of  
305 custom TALENs that target the first coding exon of *Ubx* (Figure 5A; see Methods for details).

306 One fully verified *Ubx* landing site allele was selected as the starting strain for engineering the *Ubx*  
307 locus. A *Ubx* targeting plasmid was generated, which contained a 7.8 kb fragment with a 3xFLAG tag  
308 at the N terminal end of the *Ubx* ORF and the *YPWM*->*AAAA* mutation (Figure 5B). This targeting  
309 plasmid was injected into the F1 progeny of the *vas-int(X)* females and the *Ubx* landing site males,  
310 and multiple independent RMCE lines were obtained and further verified by Southern blot. One fully  
311 verified RMCE line was subjected to simultaneous resolution, following the same procedure as for the  
312 *Antp* locus. From 100 individual cross IIs, we were able to achieve a success rate of ~50% (Figure  
313 5D).

314 Among the 49 alleles obtained, 22 were homozygous lethal, and 27 were homozygous viable (Figure  
315 5E). 13 of the homozygous lethal alleles had the right marker deleted, as shown by PCR. All 4  
316 expected genotypes, wild type, *3xFLAG-Ubx*, *Ubx(YPWM->AAAA)* and *3xFLAG-*

317 *Ubx*(YPWM->AAAA), were identified from the 27 homozygous viable alleles (Figure 5E), indicating  
318 the YPWM motif of *Ubx* is not necessary for viability. Although this W-motif is deeply conserved, this  
319 result was not unexpected because *Ubx* has multiple additional Exd-interaction motifs (Lelli et al.,  
320 2011, Merabet and Mann, 2016, Merabet et al., 2007), which may be able to partially compensate for  
321 the functions of the canonical YPWM motif. Some homozygous lethal alleles did not show a PCR  
322 product with primers designed to detect right-side marker deletion events (Figure 5E). These alleles  
323 might have undergone imprecise homologous recombination, or the marker deletion might have been  
324 accompanied by additional deletions near the dsDNA breaks, such that the primer binding sites were  
325 destroyed.

326 Southern blotting was performed to verify 16 different alleles; of these, 3 showed abnormal patterns  
327 (Figure 5-figure supplement 1) and they were discarded. 2 Southern blot verified alleles of each  
328 genotype of interest were fully sequenced, and all 6 were correct. The precise engineering of the *Ubx*  
329 locus demonstrated again the efficiency and precision of this technique.

330

331

332

333

334

335

336

337

338

339

340

341

342

343

344

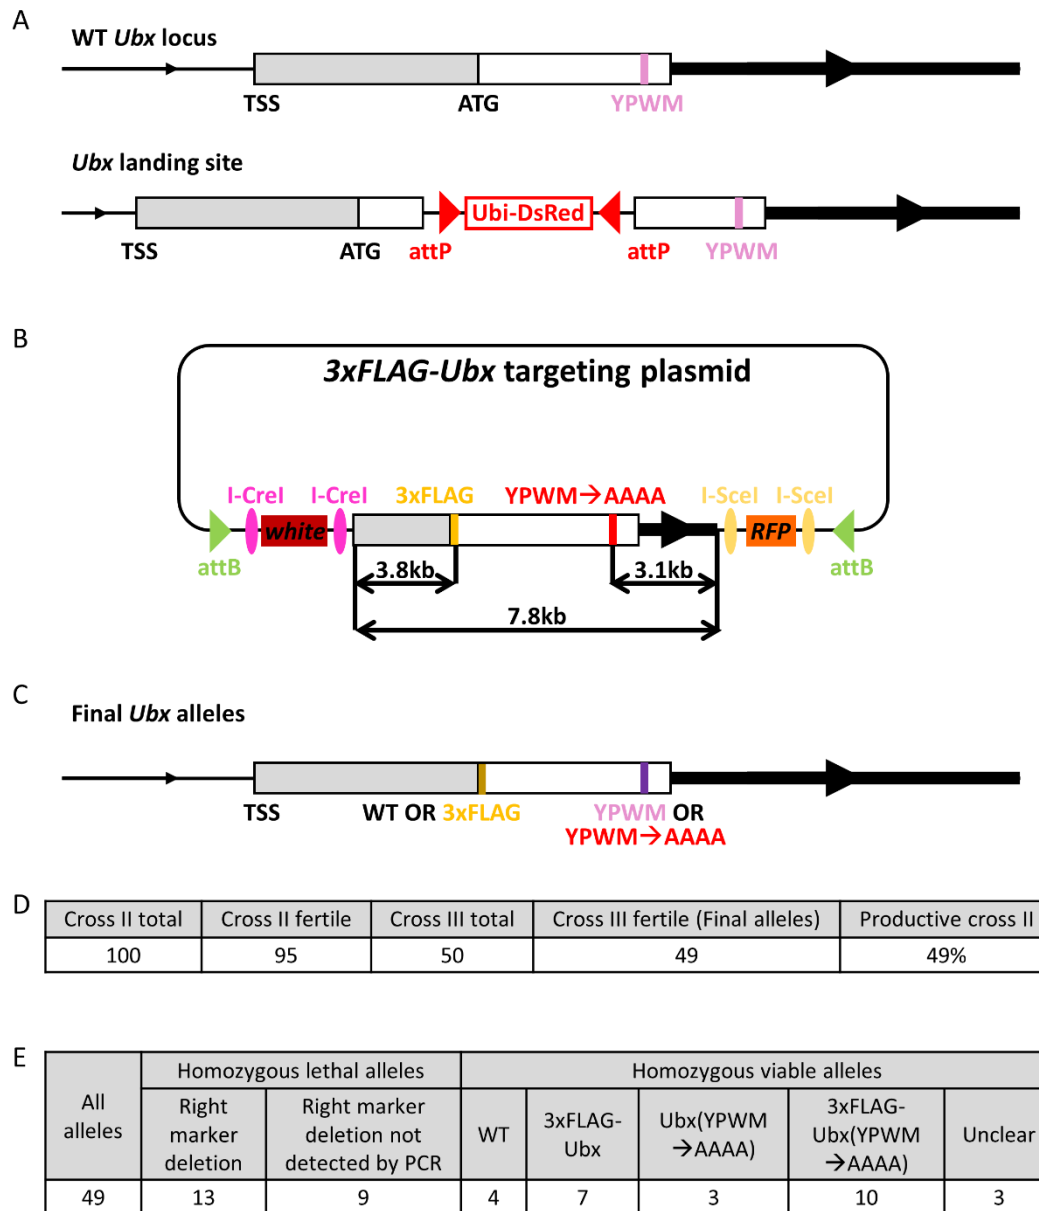

**Figure 5. Scarless engineering of the *Ubx* locus.**

**A.** Schematics of the wild type *Ubx* locus and the *Ubx* landing site allele.

**B.** The targeting plasmid used in the scarless engineering of the *Ubx* locus. The desired mutations are shown, as well as their relative positions within the integrated fragment.

**C.** The desired final scarless alleles. The schematics in A-C are not drawn to scale.

**D.** Results of *Ubx* RMCE allele simultaneous resolution.

**E.** Genotyping results of all final *Ubx* alleles. “Unclear” refers to ambiguous genotyping results for 3 homozygous viable alleles.

## 355 Generating insertions

356 The above results show that this technique can be used to efficiently mutate small stretches of  
357 genomic DNA sequence, or to insert a small fragment into a desired genomic locus. To further test  
358 the ability of this technique to generate large custom insertions, we chose to tag the endogenous  
359 *Antp* protein with GFP (**Figure 6B**). A slightly different *Antp* targeting plasmid, in which the 3x-FLAG  
360 tag was replaced with a 750 bp GFP tag (with a flexible linker between the *GFP* and *Antp* ORFs), was  
361 generated (**Figure 6A**), and multiple independent RMCE lines were obtained. One Southern blot-  
362 verified RMCE line was then used as the starting line for simultaneous resolution. Because it was  
363 unclear if and how the large-sized insertion would affect the resolution success rate, we set up 100  
364 individual cross IIs. Despite the presence of a large insertion, the resolution results had a high rate of  
365 success: 70% of cross IIs were productive (**Figure 6C**).

366 6 of the 70 final alleles were homozygous viable, from which 2 independent *GFP-Antp* alleles were  
367 obtained, as determined by PCR, while the other 4 alleles were wild type. Many *Antp*(*YPWM*->*AAAA*)  
368 and *GFP-Antp*(*YPWM*->*AAAA*) alleles were identified by PCR among the homozygous lethal alleles  
369 (**Figure 6D**). Several independent alleles of each genotype were selected for Southern blot  
370 verification (**Figure 6-figure supplement 1**) and all gave the correct patterns. Sequencing results  
371 verified that all selected alleles were correct.

372

373

374

375

376

377

378

379

380

381

382

383



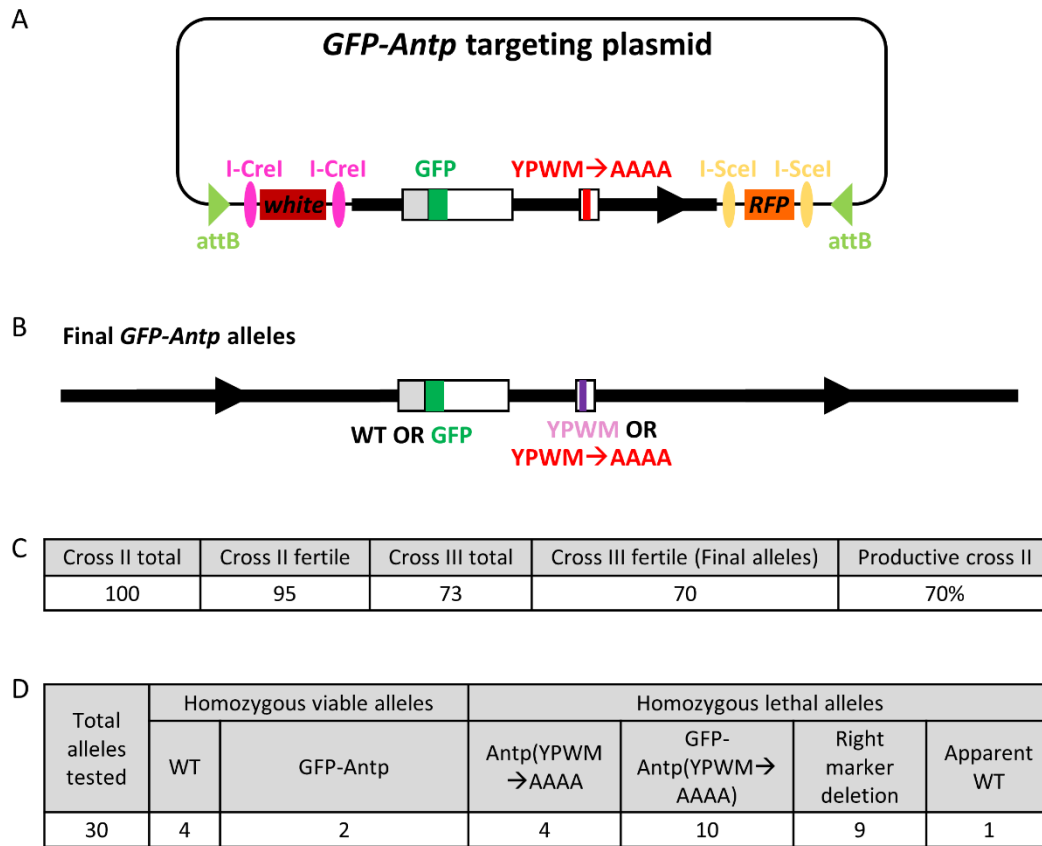

**Figure 6. Generating a precise insertion at the *Antp* locus**

**A.** The *GFP-Antp* targeting plasmid. The GFP insertion and the YPWM→AAAA mutation are indicated.

**B.** Desired final *GFP-Antp* alleles. The schematics in A and B are not drawn to scale.

**C.** Results of simultaneous resolution of the selected *GFP-Antp* RMCE allele.

**D.** Genotyping results of 30 selected *GFP-Antp* targeting final alleles.

384

385

386

387

388

389

390

391

392

393

394

395

396

397

## 398 Generating deletions

399 Finally, to test the ability of this technique to create custom deletions, the 7.5 kb *Gr28b* gene was  
400 chosen to be deleted (Figure 7A and 7C). *Gr28b* is a complex gustatory receptor locus that encodes  
401 5 different isoforms, and has been shown to have multiple functions such as thermo-preference and  
402 toxin avoidance (Ni et al., 2013, Sang et al., 2019). A *MiMIC* insertion (*MI11240*) about 300 bp away  
403 from the right end of the *Gr28b* gene was used as the landing site for the targeted deletion (Figure  
404 7A). A targeting plasmid was generated, which contained a 2 kb fragment to the left of the desired  
405 deletion, fused to a 2.3 kb fragment to the right of the desired deletion (Figure 7B). This plasmid was  
406 used to inject F1 embryos of the cross between the *vas-int(X)* female and the *MI11240* male, and  
407 multiple independent RMCE events were obtained. Unexpectedly, while some RMCE events landed  
408 on chromosome II, where the *Gr28b* gene is located, others did not map to this chromosome. The  
409 presence of the *MI11240* insertion in the original *MiMIC* stock was verified by PCR before it was used  
410 for injection, thus we hypothesized that the original *MiMIC* stock might have a secondary *MiMIC*  
411 insertion on a different chromosome. Indeed, genetic crosses indicated the presence of a second  
412 *MiMIC* insertion on chromosome IV (data not shown).

413 Nevertheless, we obtained 3 independent RMCE events at the desired *MI11240* insertion. Two  
414 alleles, A and B, inserted in the opposite orientation, while allele C was *white+*, *yellow-*, but RFP-. The  
415 lack of RFP in allele C might be due to spontaneous resolution of the right side induced by the dsDNA  
416 breaks generated by the phiC31 integrase during RMCE. Indeed, Southern blot results supported this  
417 idea (data not shown), and this allele was essentially equivalent to a right-side resolved allele.

418 All 3 RMCE alleles were subjected to simultaneous resolution (Figure 4-figure supplement 1A).  
419 Multiple independent stocks were obtained from each RMCE line, but compared to the other targeting  
420 experiments described above, a notable reduction in efficiency was observed (Figure 7D), likely  
421 because the distance between the dsDNA break and the left homologous arm was >7 kb (Figure 7A  
422 and 7B) (Gao et al., 2008).

423 All final alleles were homozygous viable and fertile, and the homozygotes were verified in several  
424 steps (Figure 7E). First, the presence of the desired deletion was determined by PCR using primers  
425 flanking the deletion. Next, those alleles that generated the correctly sized PCR product were  
426 subjected to additional PCRs using two pairs of primers against different regions of the deleted  
427 fragment. Several alleles derived from RMCE lines A and B produced positive products for all of  
428 these PCRs, suggesting that complex rearrangements occurred during resolution. 3 independent final  
429 alleles, all from RMCE line C, passed all PCR tests, and all 3 were further verified by Southern blot

(**Figure 7-figure supplement 1**) and sequencing. Thus, despite a suboptimal initial RMCE step, this technique was able to generate a large 7.5 kb custom deletion.

430  
431  
432  
433  
434  
435  
436  
437  
438  
439  
440  
441  
442  
443  
444  
445  
446  
447  
448  
449  
450  
451  
452  
453  
454

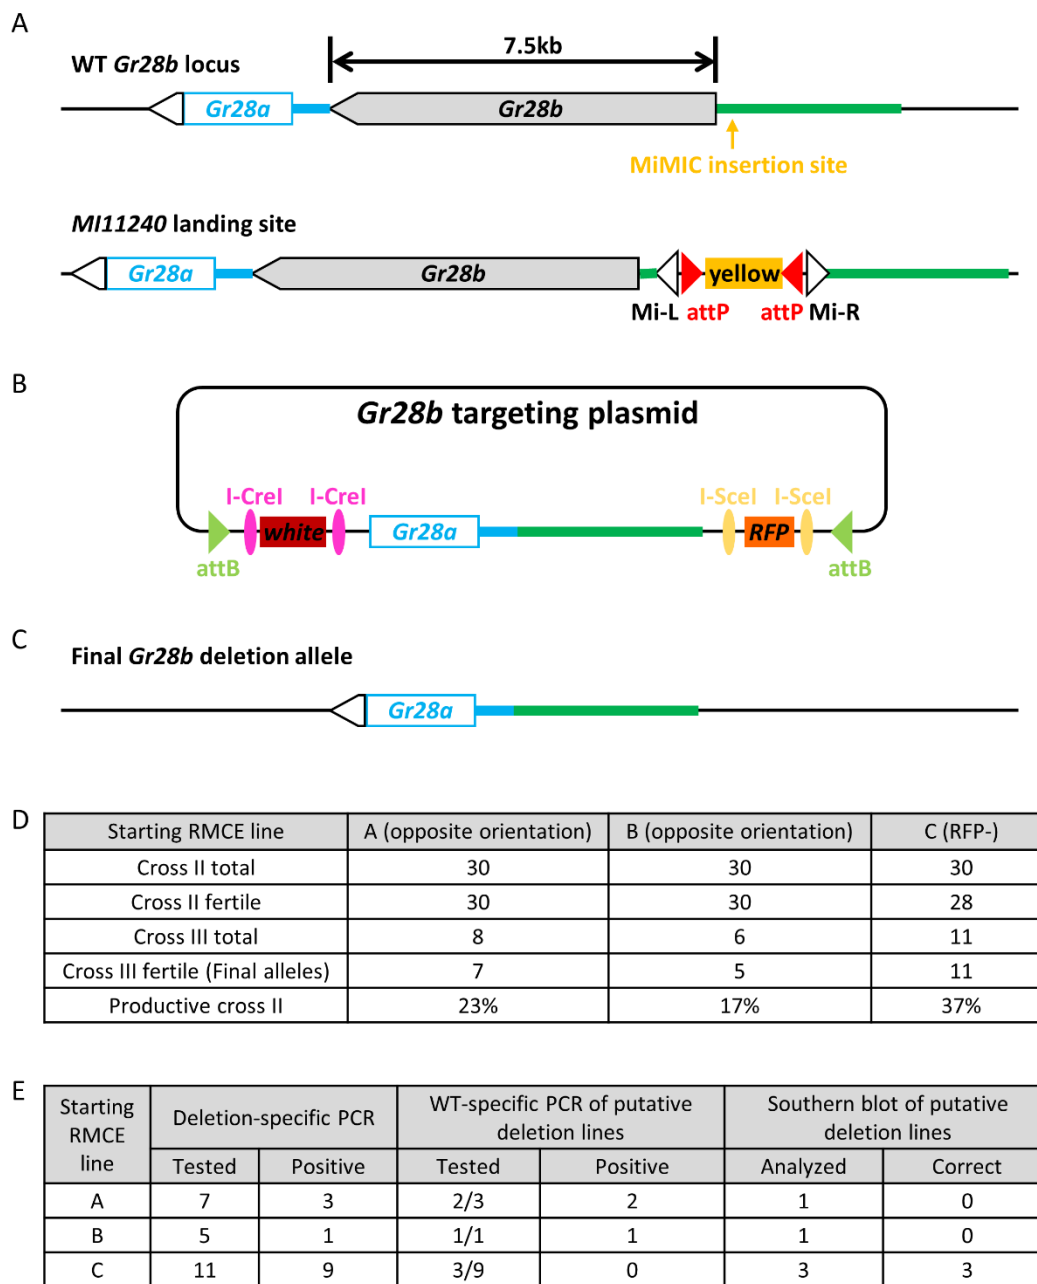

455

456 **Figure 7. The precise deletion of the 7.5 kb *Gr28b* gene.**

457 **A.** Schematics showing the wild type *Gr28b* locus and the chromosome bearing the selected *MiMIC* landing site.

458 **B.** The targeting plasmid containing an integrated fragment with the desired deletion.

459 **C.** Schematic of the desired *Gr28b* deletion allele. The schematics in A-C are not drawn to scale.

460 **D.** Simultaneous resolution results of all 3 RMCE alleles obtained from injection. Two RMCE alleles have the opposite  
461 orientation while the third likely underwent spontaneous right-side resolution during RMCE (see text for more details).

462 **E.** The genotyping results of selected *Gr28b* deletion final alleles.

463

## 464 Discussion

465 In the past several decades, research using model organisms has greatly advanced our  
466 understanding of biology. Currently, knock-out lines exist for most genes in well studied model  
467 organisms, and for future research, precise mutations, such as those affecting only a specific part of a  
468 protein, are often necessary to further elucidate the molecular mechanisms underlying various  
469 biological processes. Because any scar sequences left in the genome after custom mutagenesis  
470 might have unwanted consequences and could confound subsequent analyses, scarless engineering  
471 of the genome is often preferred. Here we describe a novel technique that is able to easily and  
472 efficiently generate scarless custom mutant alleles in the model organism *Drosophila melanogaster*.

### 473 474 Advantages of this technique

475 The advances of CRISPR based techniques have made the engineering of the *Drosophila* genome  
476 much easier, but many custom mutant alleles generated with CRISPR still contain sequence scars.  
477 Although generating scarless custom mutations in *Drosophila* is feasible, significant effort is required.  
478 And regardless of which CRISPR strategy is used, a major uncertainty is that the selected gRNA(s)  
479 might be inefficient, or even non-functional. The technique presented here avoids this uncertainty and  
480 uses RMCE, a procedure proven to be robust and efficient, to target genomic sequences near the  
481 selected landing site.

482 This technique is simple and fast. The dominant markers ensure the easy identification of desired  
483 individuals in each step, and no laborious screening is necessary. If performing the simultaneous  
484 resolution, the desired stocks could be obtained in less than two months from the starting RMCE  
485 lines.

486 This technique generates scarless mutant alleles very efficiently. If the desired genomic alterations  
487 are not large deletions that necessitate long distances between the dsDNA breaks and the  
488 homologous arms during resolution, at least 1/3 of the cross IIs are expected to be productive, and  
489 this rate of success is usually much higher, and can even be over 70%. 50 independent cross IIs  
490 should assure the successful generation of the desired allele. If multiple combinations of 2 separate  
491 modifications at the locus of interest are desired, such as in our *Hox* targeting experiments,  
492 increasing the number of cross IIs to 100 should ensure that all desired genotype combinations will  
493 be obtained. In fact, this technique is especially suitable for generating multiple combinations of  
494 discrete modifications at the locus of interest. Only one injection is performed to obtain an RMCE

495 allele that contains all individual modifications, and the final alleles of all different genotype  
496 combinations can be obtained.

497 This technique is also very robust. Microinjection is a necessary step of essentially any *Drosophila*  
498 genome engineering attempt, but microinjection has the potential to result in significant variability.  
499 Many factors, such as landing site location, or the presence of a second landing site such as in the  
500 case of the *Gr28b* deletion, could lead to suboptimal RMCE injection results. Even if only RMCE lines  
501 with opposite orientation, or only lines with spontaneous resolution are obtained and have to be used,  
502 the desired alleles can still be generated. The robustness also means that even difficult mutations,  
503 such as large deletions, could be generated with this technique, although the efficiencies are  
504 expected to be lower compared to simpler modifications.

### 505 This technique can engineer the majority of the *Drosophila* genome

506 In this study, we did not systematically test how far away from the landing site can be reached and  
507 efficiently engineered by this technique. But from previous reports of homing nuclease-mediated  
508 resolution of local duplications, we estimate that any sequence within 5 kb from the landing site could  
509 be efficiently engineered (Gao et al., 2008, Rong et al., 2002), and sequences as far as 70 kb or even  
510 further from the landing site might be engineerable (Wesolowska and Rong, 2013). During resolution,  
511 the chromatin could be resolved either to the wild type sequence, or the desired mutant sequence,  
512 and the frequency of getting the mutant allele depends on the lengths of the homologous arms, and  
513 the distance between the landing site and the locus to be engineered. For loci far from the landing  
514 site, it would likely be helpful to increase the length of the homologous arms in the targeting plasmid,  
515 such that the arms extend well beyond the locus to be engineered.

516 There are 17,500 *MiMIC* insertions (Lee et al., 2018, Nagarkar-Jaiswal et al., 2015, Venken et al.,  
517 2011) and hundreds of CRIMIC lines (which is steadily increasing) (Lee et al., 2018) that are available  
518 to the fly community. Of the 17,500 *MiMIC* insertions, the locations of 7441 are available online  
519 (<http://flypush.imgen.bcm.tmc.edu/pscreen/downloads.html>). 57.5 Mb of the fly genome lies less than  
520 5 kb from a mapped *MiMIC* insertion (see **Materials and Methods for the calculation**), thus the  
521 currently available mapped *MiMIC* insertions provide efficient access to about half of the 117 Mb  
522 euchromatic fly genome (Hoskins et al., 2015) by this method. Moreover, these mapped *MiMIC*  
523 insertions represent only a subset of all available insertions containing inverted attP cassettes, and  
524 insertions with single attP sites, or even FRT sites, are also potential landing sites (see below).  
525 Finally, the 5 kb limit for genome modification is also a conservative estimate. Taken together, we  
526 estimate that with available landing sites, this method could be used to precisely engineer the  
527

majority of the fly genome in a scarless manner. In case there is no suitable landing site near the locus of interest, such as our engineering the *Ubx* locus, a custom landing site can be generated to facilitate scarless genome editing.

### Sequential resolution vs. simultaneous resolution

We have tested two different resolution strategies, sequential resolution and simultaneous resolution. Simultaneous resolution is much faster and can generate the desired alleles from the RMCE lines in less than 2 months. Sequential resolution, on the other hand, takes longer because the one-side resolved alleles must be verified before the second side is resolved. The sequential resolution strategy, however, offers higher efficiency. Except for difficult mutations, essentially over 90% of independent cross IIs were successful, and the failures were only due to sterile male flies. Therefore, when difficult mutations, such as large insertions or deletions, are to be generated, a sequential resolution strategy might be preferred. In fact, to generate the 7.5 kb *Gr28b* gene, all correct deletion alleles were obtained by sequential resolution, except that the first resolution occurred spontaneously during RMCE. When performing sequential resolution, the starting RMCE lines must have the correct orientation, but RMCE lines with the opposite orientation can be used for simultaneous resolution, without an apparent decrease in efficiency.

### Potential extensions of this technique

In this study, only inverted attP cassettes were used as landing sites. It has previously been reported that for homing nuclease mediated resolution of local duplications, resolution efficiency inversely correlated with the distance between homologous arms on chromatin and dsDNA breaks (Gao et al., 2008). Landing sites with inverted attP cassettes are expected to give the highest resolution efficiency, because when RMCE lines from these landing sites are subjected to homing nuclease mediated resolution, only short non-homologous sequences exist between the dsDNA breaks and the homologous arms. However, this does not mean that only inverted attP cassettes can be used as landing sites. Transposon insertions containing a single attP site are also valid landing sites. When using a single attP site as the landing site, the entire targeting plasmid will be integrated into the genome via phiC31 integrase mediated site-specific recombination. The targeting plasmid backbone, as well as extra sequences present in the original attP-containing transposon, will increase the distances between homologous arms on chromatin and the dsDNA breaks. This will likely lead to a decreased resolution efficiency, and aberrant rearrangements might be more frequent (Gao et al.,

2008). Nevertheless, given the high efficiency of this technique, we expect that the desired alleles can still be generated.

In addition, flippase (FLP) mediated recombination between FRT sites has been used to integrate plasmids into the *Drosophila* genome in a site-specific manner (Horn and Handler, 2005). In principle, FRT sites could also be used as an initial landing site for this method. However, due to the bidirectional nature of recombination between FRT sites, the plasmid integration efficiency would be expected to be lower than the unidirectional attB-attP integration mediated by phiC31 integrase. Once successful integration events are obtained, the resolution step should work equally well compared to attB-attP integration events. Targeting vectors for single attP and FRT landing sites have been generated (Figure 1-figure supplement 2).

The general principle we demonstrate in this study is that any genomic locus can be engineered in a scarless manner if a DNA fragment can be integrated nearby. Due to the highly conserved homologous recombination pathways, we expect this principle to be applicable to other organisms.

## Acknowledgements

We would like to thank Yikang Rong for the hs-I-SceI fly line, Al Handler for the pXLBacII-pUbDsRed-T3 plasmid, and Susan Parkhurst for the p[sChFP] plasmid. We thank Timothy J. Dahlem for his help with the design and production of the TALEN encoding plasmids. We also want to thank all past and present members in the Mann lab for insightful discussions. This study was supported by NIH Grant 5R21NS105507-02 to WBG and NIH grant R35GM118336 to RSM.

## Competing Interests

The authors declare no competing interests.

## Materials and Methods

### A. Materials

Restriction enzymes, CIP, Klenow fragment, T4 DNA polymerase and T4 DNA ligase were purchased from the New England Biolabs. Oligos were all purchased from Fisher Scientific. DH5alpha (competent cells made in house), and Stbl2 cells (Invitrogen 10268019) were the *E. coli* strains used for cloning. TALEN plasmids were designed by and purchased from University of Utah Mutation



590 Generation and Detection Core Facility. DNA Molecular Weight Marker II, DIG-labeled (Roche  
591 11218590910) was used as marker for all Southern blot experiments.

592

593 Commercial kits:

594 AmpliScribe SP6 Transcription Kit (Epicentre AS3106).

595 ScriptCap m<sup>7</sup>G Capping System (Cellscript C-SCCE0625).

596 DIG High Prime DNA Labeling and Detection Starter Kit II (Roche 11585614910)

597 DIG Wash and Block Buffer Set (Roche 11585762001)

598

599 Plasmids:

600 pBluescript II KS(+)

601 pUAST (Brand and Perrimon, 1993)

602 pUASTattB (Bischof et al., 2007)

603 p[sChFP] (Abreu-Blanco et al., 2012)

604 pUCHsneo-Act (DGRC 1210) (Thummel et al., 1988)

605 pH-Stinger (DGRC 1018) (Barolo et al., 2000)

606 The MiMIC vector pMiLR-attP1-2-yellow-SA-EGFP (DGRC 1321) (Venken et al., 2011)

607 pXLBacII-pUbDsRed-T3 (a gift from Al Handler) (Handler and Harrell, 2001)

608 Addgene plasmid No. 26224

609

610 Flies:

611 From Bloomington:

612 5905 (isogenic *w*<sup>1118</sup>)

613 6936 (*P*{*v*, *hs-l-CreI*}; *ry*<sup>506</sup>),

614 19139 (*w*<sup>1118</sup>; *P*{*w*[+*mC*]=*XP*}*Ubx*<sup>d00281</sup>/*TM6B*, *Tb*<sup>1</sup>)

615 36313 (*y*<sup>1</sup>, *M*{*RFP*[3*xP3*.*PB*] *GFP*[*E*.3*xP3*]=*vas-int.B*}*ZH-2A w*\*; *Sb*<sup>1</sup>/*TM6B*, *Tb*<sup>1</sup>)

616 28877 (*lig4*)

617 24482 (*y*<sup>1</sup>, *M*{*RFP*[3*xP3*.*PB*] *GFP*[*E*.3*xP3*]=*vas-int.Dm*}*ZH-2A w*\*; *M*{3*xP3*-*RFP.attP*'}*ZH-51C*)

618 33187 (*Antp*<sup>MI02272</sup>)

619 55598 (*MI11240*)

620 *w*-; *P*{*v*, *hs-l-Scel*}, *Sco*/*CyO* (a gift from Yikang Rong).

621

## 622 B. Methods

### 623 1. The design and optimization of the targeting vectors

624 3 variants of the targeting vector were designed, one for use with landing sites containing an inverted  
625 attP cassette (pTargeting-RMCE), which had from the left to the right the following elements: attB-  
626 FRT, I-CreI-mini-white-I-CreI, MCS, I-SceI-hsneo-3xP3-RFP-I-SceI, attB (Figure 1-figure supplement  
627 1A). The other two vectors were for use with landing sites with a single attP or FRT site (pTargeting-  
628 (+) and pTargeting(-)), which did not have the right most attB element, and differ by the orientation of  
629 the left most attB-FRT element relative to other elements in the vectors. It is worth noting that for the  
630 FRT sequence, both orientations have been defined as “positive” by different researchers, so it is  
631 important to inspect the actual FRT sequence in the landing site. In addition, the *3xP3-RFP* marker in  
632 all targeting vectors has a single loxP site (irrelevant to genome editing), which was present in the  
633 PCR template from which the *3xP3-RFP* marker was amplified.

634 The initial pTargeting-RMCE vector was used to generate a targeting plasmid to engineer the *Antp*  
635 locus using the *Antp*<sup>MI02272</sup> *MiMIC* insertion as the landing site, and RMCE events were identified by  
636 the loss of the *yellow* marker, which marks the original *MiMIC* insertion. The *hs-neo* marker worked  
637 as expected, conferring G418 resistance to the RMCE flies. However, there was only very weak RFP  
638 expression in the eyes, and no *white* expression could be detected. The weak RFP expression was  
639 due to the upstream *hs-neo* element, which is expected to be transcribed through the *3xP3-RFP*  
640 marker gene because it did not have a transcription termination signal. This problem was solved by  
641 adding an SV40-polyA element downstream of *hs-neo* and upstream of *3xP3-RFP*. This SV40-polyA  
642 element was included in all subsequent targeting vectors.

643 The lack of *mini-white* expression is most likely due to it being silenced in the *Antp* locus. The main  
644 evidence supporting this explanation is that all *mini-white* insertions that are expressed within the  
645 *Antp* locus are flanked by insulator elements. A similar observation was also seen in the *Bithorax*  
646 *Complex*, where the *Hox* gene *Ubx* resides. Within the *Bithorax Complex*, all *mini-white* marked  
647 transposons also have insulated *mini-white*, while immediately outside of the *Bithorax complex*, both  
648 insulated and non-insulated *mini-white* genes are expressed. Consistently, the non-insulated *mini-*  
649 *white* marker is silenced when inserted into the majority of genomic loci (Handler and Harrell, 1999,  
650 Horn et al., 2000). Insulated targeting vectors were thus generated, in which 4 *gypsy* insulators were  
651 added to each version of the vectors, 2 flanking *mini-white*, and 2 flanking *hsneo-3xP3-RFP*. There  
652 are repetitive sequences in the *gypsy* insulators, and two insulators near each other would make the  
653 plasmids unstable. Therefore, a ~2 kb spacer (from the *Drosophila yellow* gene) was inserted into the

654 middle of the MCS in all insulated targeting vectors, to separate the right *mini-white* insulator from the  
655 left *hsneo-3xP3-RFP* insulator (**Figure S1A**). Because of the presence of multiple insulators, *Stb12 E.*  
656 *coli* cells, which increases the stability of plasmids with repetitive sequences, must be used to  
657 manipulate the insulated targeting vectors. All preps of targeting plasmids derived from insulated  
658 targeting vectors should be verified by restriction digestion verification before being used in injection,  
659 as plasmid rearrangement happens more frequently during the growing of large volume *E. coli*  
660 cultures.

661 The details of targeting vector cloning are in **Supplementary file 1**, and the sequences of all targeting  
662 vectors are in **Supplementary file 3**.

## 664 2. The generation of the *Ubx* landing site line

665 To generate a custom landing site in the *Ubx* locus between the ATG start codon and the W-motif  
666 codons, a pair of TALENs were designed. To avoid potential issues caused by natural  
667 polymorphisms, this *Ubx* region of the *lig4* strain (Bloomington #28877), which would be used in  
668 TALEN-mediated genome targeting, was PCR amplified and sequenced. The exact sequence in the  
669 *lig4* strain was sent to the University of Utah Mutation Generation and Detection Core Facility for  
670 identification of optimal TALEN target sites, and the most promising pair of TALENs were then  
671 purchased. The TALEN target sequence is: TGCCCGTTAGACCCTCCGCCT-gcaccccagattcccg-  
672 AGTGGGCGGCTATTTGGA, in which the upper-case letters show the TALEN binding sites, and the  
673 lower-case letters indicate the spacer between the two binding sites.

674 The TALEN plasmids were linearized by restriction digestion and gel purified, and were used as  
675 templates for *in vitro* transcription using the AmpliScribe SP6 Transcription Kit (Epicentre AS3106).  
676 The mRNAs were then capped in a subsequent reaction using the ScriptCap m<sup>7</sup>G Capping System  
677 (Cellscript C-SCCE0625).

678 A vector, *pCassette-ubiDsRed*, was generated, which has an *ubiDsRed* marked inverted attP  
679 cassette flanked by two different multiple cloning sites (MCS) for inserting homologous arms. *Ubx-N-L*  
680 and *Ubx-N-R* homologous arms were cloned into these two MCS sites to generate the *pCassette-*  
681 *Ubx-N* donor plasmid. A mixture of this donor plasmid (final concentration 500 ng/ul) and the two  
682 capped TALEN mRNAs (final concentration 400 ng/ul each) was injected into the blastoderm of *lig4*  
683 embryos (injection done by BestGene Inc.), and the desired homologous events were identified by  
684 strong ubiquitous DsRed expression in the F1 generation. Positive individuals were used to generate

685 stocks and several independent stocks were verified by Southern blot and sequencing. One fully  
686 verified line was used as *Ubx* landing site line.

687 The sequences of the TALEN plasmids are in [Supplementary file 3](#), and the detailed cloning steps for  
688 the landing site donor plasmid are in [Supplementary file 1](#).

### 689 **3. Building suitable homing nuclease-expressing fly strains.**

690 Standard fly genetics was used to mobilize P element to obtain *hs-I-Scel(X)* and *hs-I-Crel(II)*.  
691 Because the *hs-I-Scel* transgene was marked with *vermillion (v)*, an attempt was made to generate  
692 the line  $v^1; P\{v, hs-I-Scel\}, Sco/CyO$  for P element mobilization from the strain  $w^-; P\{v, hs-I-Scel\},$   
693  $Sco/CyO$  (a gift from Yikang Rong). However,  $v^1/(FM7C); P\{v, hs-I-Scel\}, Sco/CyO$  females were  
694 sterile, so instead, the line  $v^1; Pin, P\{v, hs-I-Scel\}/CyO$  was generated, and was used as the starting  
695 line to jump  $P\{v, hs-I-Scel\}$  from chromosome II to X chromosome. The  $P\{v, hs-I-Crel\}$  P element was  
696 jumped to chromosome II from the X chromosome, using  $v^1, P\{v, hs-I-Crel\}; ry^{506}$  (Bloomington  
697 #6936) as the starting line.

698 X chromosome with the genotype  $v^1, P\{v, hs-I-Scel\}, P\{v, hs-I-Crel\}$ , and chromosome II with the  
699 genotype  $Pin, P\{v, hs-I-Scel\}, P\{v, hs-I-Crel\}$  were then generated by recombination.  $v^+$  recombinants  
700 were screened for the presence of both *hs-I-Scel* and *hs-I-Crel* transgenes by PCR using primer pairs  
701  $hs-I-Scel-5' + hs-I-Scel-3'$ , and  $hs-I-Crel-5' + hs-I-Crel-3'$ , respectively. Finally, appropriate balancers  
702 were added by crossing.

703 All primer sequences are in [Supplementary file 2](#).

### 704 **4. Cloning of the integrated fragments**

705 For *Antp* and *Ubx* targeting, the integrated fragment was assembled from 3 sub-fragments, and the  
706 ~2 kb middle sub-fragment contained the loci to be mutated. The 3 sub-fragments were PCR  
707 amplified from genomic DNA and cloned into the pBluescript vector. Both the PCR products and the  
708 cloned fragments were fully sequenced to ensure no PCR-introduced mutations in the cloned  
709 fragments. The desired mutations were then introduced to the middle sub-fragment by standard  
710 procedures. Next, a 3-fragment ligation was performed to assemble the complete integrated fragment  
711 in pBluescript. The assembled integrated fragment was then cloned into the targeting vector  
712 *pTargeting-RMCE-insulated*. For *Gr28b* deletion, a 2kb left arm and a 2.3kb right arm flanking the  
713 desired deletion were PCR amplified from genomic DNA, digested with restriction enzymes, and  
714  
715

ligated into pBluescript in a 3-fragment ligation reaction. The 4.3 kb integrated fragment was then cloned into the targeting vector *pTargeting-RMCE-insulated*.

All detailed cloning steps are in [Supplementary file 1](#).

## 5. The identification and verification of RMCE alleles.

All the landing site lines were verified before being used in injections. The *Ubx* landing site line was generated in this study, and was fully verified by Southern blot analysis and sequencing. For *Antp* and *Gr28b* targeting, *MiMIC* insertions were used as landing sites, and the presence of the desired *MiMIC* insertions was verified by PCR. Clean genetic sublines, which removed a linked lethal mutation, were derived from single *Antp*<sup>Mi02272</sup> chromosomes, and one was selected for all subsequent injections.

Initially, *vas-int(X); MiMIC* stocks were generated and tested for injection, but the injected embryos suffered high fatality rates. Improved survival was obtained from injecting the F1 embryos of the crosses between the *vas-int(X)* females and landing site containing males. All injections were done by BestGene Inc. G0 adults from the injected embryos were individually crossed to suitable balancer stocks, and the F1 flies were screened for RMCE events. The RMCE alleles were identified by the presence of the *mini-white* marker, and the presence of *3xP3-RFP* and the loss of the original landing site marker were then confirmed for all *white*<sup>+</sup> individuals. RMCE stocks were then established from individual flies with the correct marker patterns. The orientations of the RMCE lines were determined by PCR.

At first, RMCE alleles were verified by Southern blotting before they were used for resolution. Later, a more efficient procedure was used: several RMCE alleles with the correct marker patterns were subjected to resolution without Southern blot verification, and fewer individual cross IIs from each RMCE allele were set up. After getting all final mutant alleles, Southern blot analyses of the RMCE alleles were performed alongside with selected final mutant alleles. This arrangement also enables more independent mutant alleles to be obtained.

During injections, 2 classes of abnormal recombination events were observed. 1. Some transformants had both *mini-white* and *3xP3-RFP*, but the original landing site marker (*yellow* or *ubiDsRed*) remained present. These events probably resulted from site-specific recombination between a single pair of attP and attB sites, whereas the other recombination events did not happen. Or maybe two different plasmids were integrated into the genome, each via one site-specific recombination event. 2. As mentioned in the Results section, some transformants lost the landing site marker, but only *mini-*

748 *white* was present, and no *3xP3-RFP* was observed. This class was most likely because of  
749 spontaneous resolution of the right end during phiC31 integrase mediated RMCE, in which dsDNA  
750 breaks were introduced within the attP and attB sites, and could have triggered homologous  
751 recombination. The RMCE transformants were usually selected by the presence of *mini-white*, and  
752 the presence of *3xP3-RFP* and the absence of the landing site marker were confirmed later.  
753 Therefore, it is reasonable to expect that *3xP3-RFP+*, *white-*, *yellow-(ubiDsRed-)* transformants also  
754 existed, but they were unidentified. Spontaneous resolution of both ends during RMCE might also  
755 happen at low frequency.

756 The primer sequences for verifying *MiMIC* and RMCE alleles are in [Supplementary file 2](#).

## 758 **6. Resolving the RMCE alleles to generate the final mutant alleles, and the definition of** 759 **productive cross IIs**

760 The crosses to resolve RMCE alleles of different chromosomes are shown in [Figure 3](#), [Figure 4A](#) and  
761 [Figure 4-figure supplement 1](#). All crosses were performed at 25°C. The following describes details of  
762 the resolution steps for chromosome II or III targets. If the target is on the X chromosome, individual  
763 females must be used in Cross IIs and Cross IIIs, and some details should be adjusted accordingly.

764 For Cross I, several vials of crosses were set up, and the flies were allowed to accommodate for a  
765 few days. The adults were then allowed to lay embryos for 72 hours before being transferred to new  
766 vials, and the embryo/larvae in the old vials were heat shocked at 37°C. If I-SceI was the only homing  
767 nuclease expressed, 1-hour heat shock was performed. A 20-minute heat shock was performed if I-  
768 CreI was involved, either with or without I-SceI (Note: in the sequential resolution reported here, a 40-  
769 minute heat shock was performed to induce I-CreI expression, but later results showed that a 20-  
770 minute heat shock might give better efficiency). A second 72-hour collection and heat shock might be  
771 performed if necessary. When the heat shocked individuals reach adult stage, males of the desired  
772 genotype were individually crossed to a balancer line in Cross II. The progeny of Cross IIs was  
773 screened once every 2 to 3 days for males that lost the desired marker(s). For simultaneous  
774 resolution, white-eyed males were first identified, and the *3xP3-RFP* marker was then inspected  
775 under a fluorescent scope. Once male progeny that lost the desired marker(s) was identified from a  
776 Cross II, this particular Cross II was not screened further. To ensure all final alleles were  
777 independent, for each Cross II, only one Cross III was set up. If the selected individual male used in a  
778 Cross III turned out to be sterile, no extra Cross IIIs were set up for the corresponding Cross II, even  
779 if that Cross II might have produced more males that lost the desired marker(s).

780 For the purpose of easy scoring and comparison, a productive Cross II was defined as an individual  
781 Cross II that eventually generated a final stock. Occasionally, the selected single male from a Cross II  
782 was sterile, and this particular Cross II would be scored as non-productive. In some cases, the final  
783 stock from a Cross II might not be a correctly resolved allele (for example, it might be a right marker  
784 deletion event), but such a Cross II would be scored as productive according to the above definition.

## 785

### 786 **7. Southern blot analysis**

787 Southern blots were performed using the DIG High Prime DNA Labeling and Detection Starter Kit II  
788 (Roche 11585614910) and the DIG Wash and Block Buffer Set (Roche 11585762001), according to  
789 manufacturer's instructions. DNA Molecular Weight Marker II, DIG-labeled (Roche 11218590910)  
790 was used as marker. In general, two probes were needed to verify the selected alleles. After  
791 hybridizing with the first probe, the blot was stripped and re-hybridized with the second probe  
792 according to manufacturer's instructions. For *Antp* and *Ubx* targeting, the left and right sub-fragments  
793 in the integrated fragment (see above) were used to generate DIG labeled 5' and 3' Southern blot  
794 probes. For *Gr28b* deletion, the left and right arms (see above) were used as templates to generate  
795 the probes.

### 796

### 797 **8. Sequencing of the mutant alleles**

798 For all selected final mutant alleles, the genomic region corresponding to the integrated fragment in  
799 the targeting plasmid plus short (100-200bp or so) flanking regions was completely sequenced. For  
800 homozygous lethal alleles, embryos were collected overnight at 25°C from the balanced stock, and  
801 were further aged at 25°C for at least 30 hours. 6 unhatched embryos were randomly selected and  
802 single embryo genomic DNA extraction was performed. A fragment covering the regions with desired  
803 mutation(s) was PCR amplified and sequenced to genotype the selected embryos. Homozygous  
804 mutant embryos were identified and their genomic DNA samples were used as PCR templates. For  
805 homozygous viable alleles, homozygotes were used to extract genomic DNA. The region to be  
806 sequenced was divided into 2-3kb fragments with small overlaps. These fragments were PCR  
807 amplified with Phusion DNA polymerase, and gel purified before sequencing with sequence specific  
808 primers. Gel purification was necessary to obtain high quality sequencing results, especially if the  
809 genomic DNA was from single embryos.

810 In all the targeting cases reported in this study, there are natural polymorphisms between the landing  
811 site line and the line from which the donor fragment was PCR amplified. The pattern of

812 polymorphisms in the resolved lines generally showed the expected pattern: the landing site-proximal  
813 regions often had the polymorphisms from the integrated fragments, while the landing site-distal  
814 regions usually had the polymorphisms from the original landing site line.

## 816 **9. Calculating the fraction of the fly genome accessible by our technique.**

817 In this study, we calculated the fraction of the fly genome that can be accessed by our technique from  
818 a mapped *MiMIC* insertion, assuming 5 kb near a landing site can be reached without difficulty. The  
819 *MiMIC* insertions were selected for calculation because these are among the most efficient landing  
820 sites and there are well-documented *MiMIC* mapping data at the base pair resolution.

821 The *MiMIC* mapping results were downloaded from the URL:

822 <http://flypush.imgen.bcm.tmc.edu/pscreen/downloads.html>. The original file contains the base pair

823 positions of 7441 *MiMIC* insertions, all of which are in euchromatic regions. 9 insertions with  
824 incomplete mapping information were dropped, leaving 7432 insertions with complete mapping  
825 information. A bed file containing 10 kb genomic intervals centered at each of these 7432 *MiMIC*  
826 insertions was then generated. Next, the “MergeBED” function in bedtools (performed on  
827 usegalaxy.org) was used to generate a new bed file that contains 4154 non-redundant genomic  
828 intervals covering all sequences equal to or less than 5kb from one of the 7432 *MiMIC* insertions. The  
829 length (in base pair) of each of these 4154 genomic intervals was then calculated in Microsoft Excel.  
830 Finally, the total length of all 4154 intervals was calculated to be 57,528,100 bp, which is roughly half  
831 of the fly genome that is euchromatic (117 Mb) (Hoskins et al., 2015).

832 Since the mapped *MiMIC* lines represent only a subset of all available landing sites, and the estimate  
833 that 5 kb flanking a landing site can be engineered is a conservative one, the actual fraction of  
834 accessible fly genome is expected to be significantly larger than 50%.

841 **Supplementary figures**



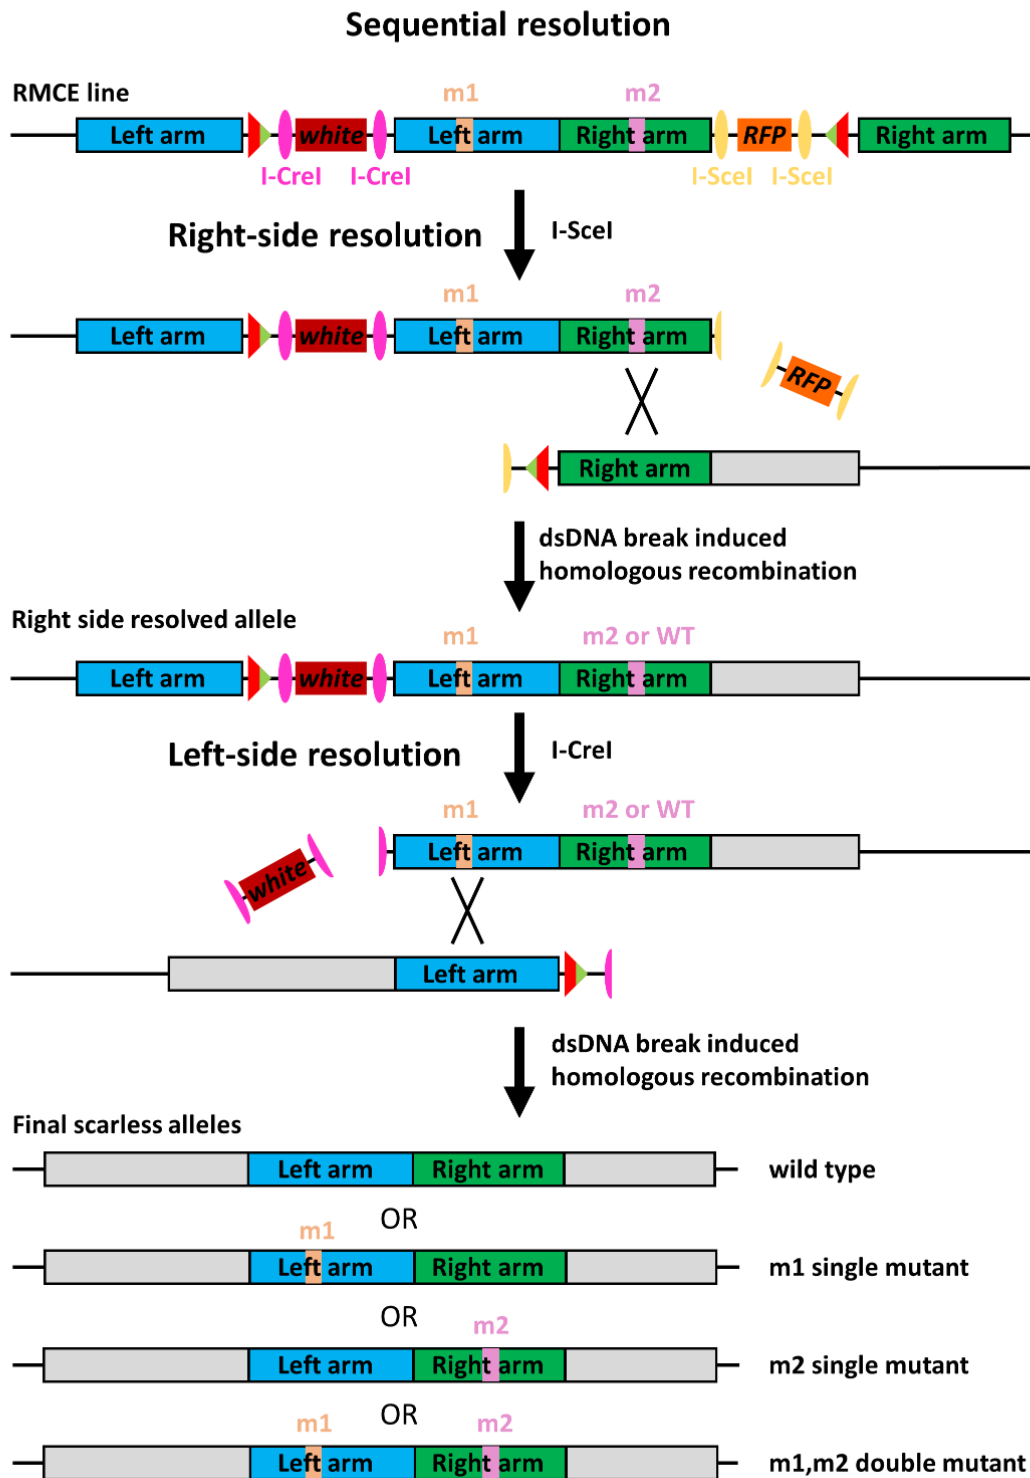

842

843

**Figure 1-figure supplement 1. Sequential resolution of the RMCE line.**

844

Schematics showing sequential resolution of the RMCE allele. The right side is first resolved by I-Sce1 expression,

845

followed by left-side resolution by the expression of I-Cre1.

846

847

## A Targeting vectors

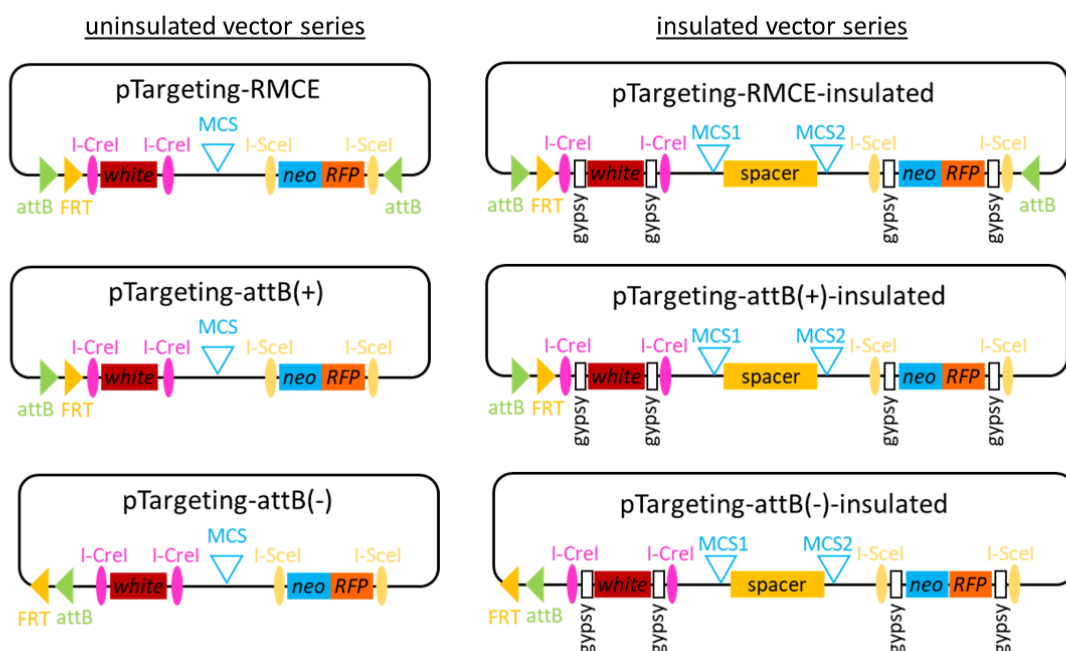

## B

### MCS of uninsulated vectors

.....GTTTG TTAATTAA GCAT GCGATCGC ATTC GCGCGCC AT CGCCGGTG TG  
                   Pacl                  AsiSI                  AscI                  SgrAI  
 CCTGCAGG TGGTTAAACCT GGCCGGCC GGGCCCC CCTCGAGG TAGGG.....  
                   SbfI                  FseI                  PspXI

### MCS1 and MCS2 of insulated vectors

...TG TTAATTAA GCGATCGC ACGCGT GCGCGCC CGCCGGTG AGATCT GA...  
                   Pacl                  AsiSI                  MluI                  AscI                  SgrAI                  BglII  
 [spacer]...G CCTAGG ACCGGT CCTGCAGG GGCCGGCC GGGCCC CCTCGAGG A...  
                   AvrII                  AgeI                  SbfI                  FseI                  PspXI

848

849

## 850 Figure 1-figure supplement 2. Targeting vectors

851 **A.** Maps of targeting vectors. The RMCE vectors are for landing sites containing inverted attP cassette, and the attB  
 852 vectors are for landing sites with a single attB (or FRT) site. The (+) and (-) versions differ in the orientations of the attB  
 853 and FRT sites relative to the rest of the vector. The uninsulated series are suitable for loci where *mini-white* is known to be  
 854 expressed, and the insulated series should be used in loci where *mini-white* is or might be silenced. One way to determine  
 855 if *mini-white* is silenced in the locus of interest is to examine existing *mini-white* marked transposon insertions near the  
 856 locus of interest. If all such transposons contain insulated *mini-white*, *mini-white* is likely to be silenced near this particular  
 857 locus in the genome. See **Materials and Methods** for more details on the silencing of *mini-white*.

858 **B.** The multiple cloning site regions of the targeting vectors. Only unique restriction sites are indicated. For insulated  
859 vectors, the 2 kb spacer separates the two flanking insulators and reduces plasmid instability during cloning. One site  
860 from MCS1 and one from MCS2 should be selected when using the insulated vectors to remove the spacer.

861

862

863

864

865

866

867

868

869

870

871

872

873

874

875

876

877

878

879

880

881

882

883

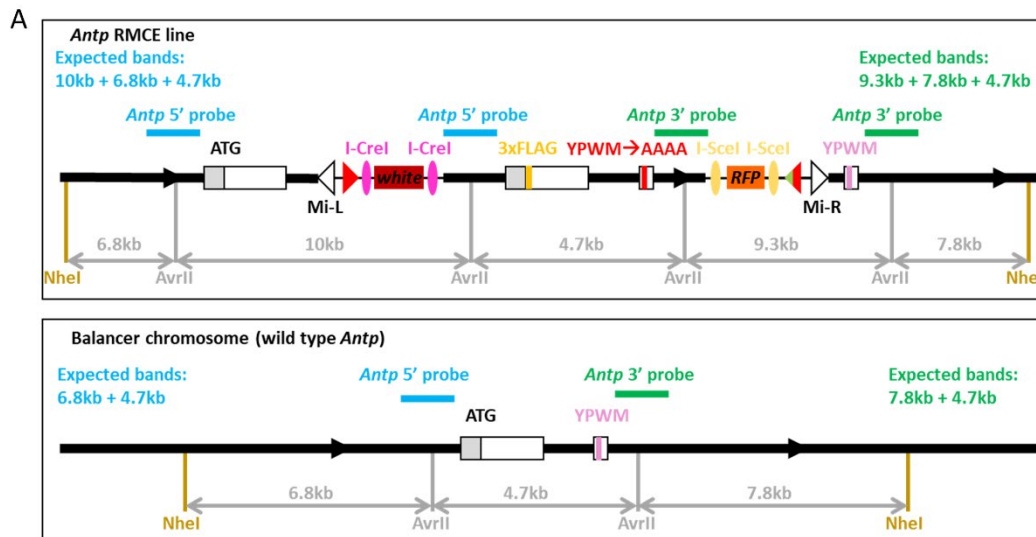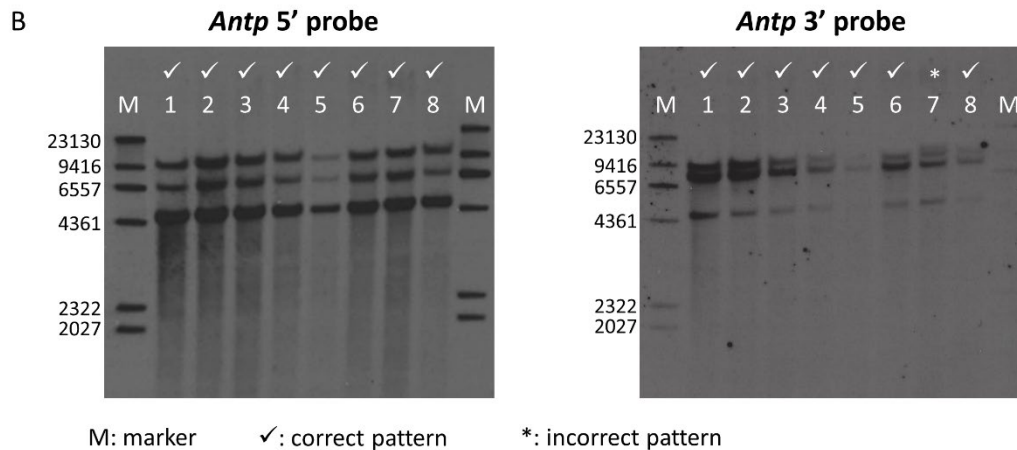

884

885 **Figure 2-figure supplement 1. Southern blot verification of multiple independent *Antp* RMCE alleles.**

886 **A.** Restriction maps of the *Antp* RMCE allele and the wild type *Antp* allele (the balancer chromosome). The positions of  
 887 relevant restriction sites and the sizes of all relevant restriction fragments are shown. The regions used as 5' and 3'  
 888 Southern blot probes are indicated with blue and green bars. The expected Southern blot patterns for each probe are also  
 889 shown. The schematics are not drawn to scale.

890 **B.** Southern blot results for 8 independent *Antp* RMCE alleles. The *Antp* RMCE alleles are homozygous lethal and are  
 891 balanced with a balancer chromosome, which contributes to the observed Southern blot patterns. Sample 7 has an  
 892 additional band above the 9.3 kb band when blotted with the *Antp* 3' probe, indicating it might have additional  
 893 rearrangement(s).

894

895

896

897

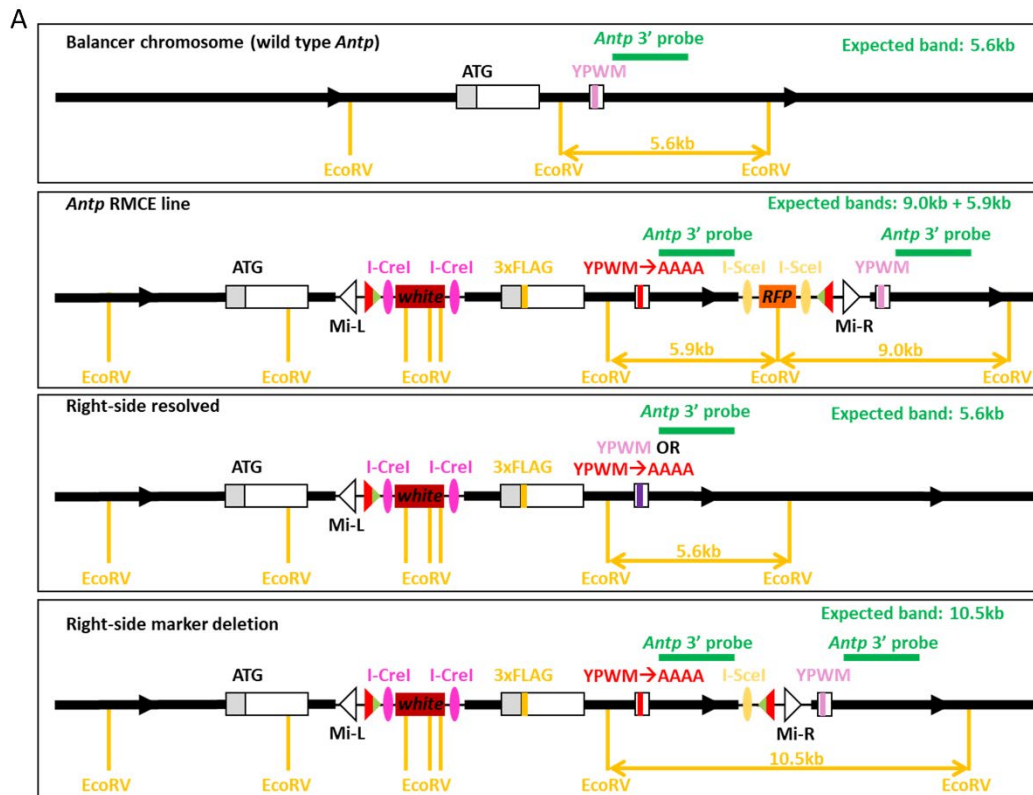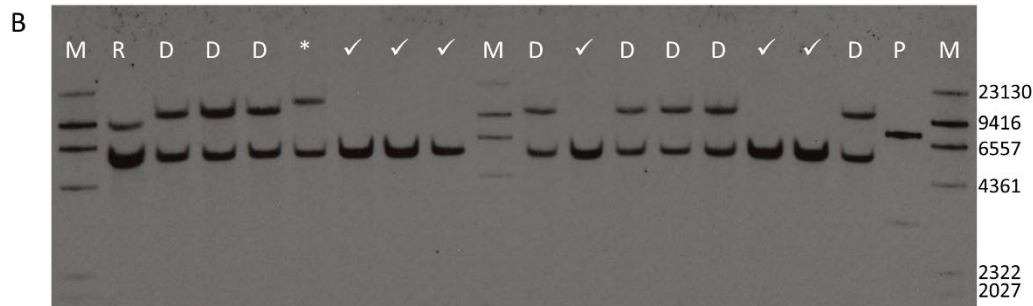

M: marker P: positive control R: RMCE line

✓: right-side resolved D: marker deletion \*: unexpected pattern

**Figure 3-figure supplement 1. Southern blot analysis of alleles from I-SceI mediated right-side resolution.**

**A.** Restriction maps of various genotypes. The positions of relevant restriction sites and the lengths of relevant restriction fragments are indicated. The green bar indicates the region used as the *Antp* 3' probe, and the expected Southern blot pattern for each genotype is also shown. The schematics are not drawn to scale.

**B.** Southern blot analysis of a subset of selected alleles. All alleles are homozygous lethal and are balanced with a balancer chromosome, which gives a 5.6 kb band. The positive control is restriction digested plasmid with a fragment from *Antp*.

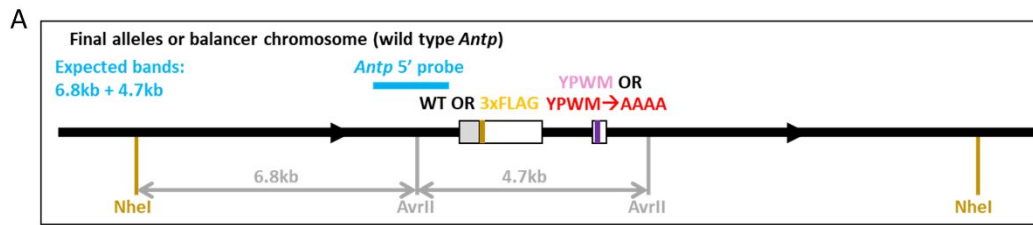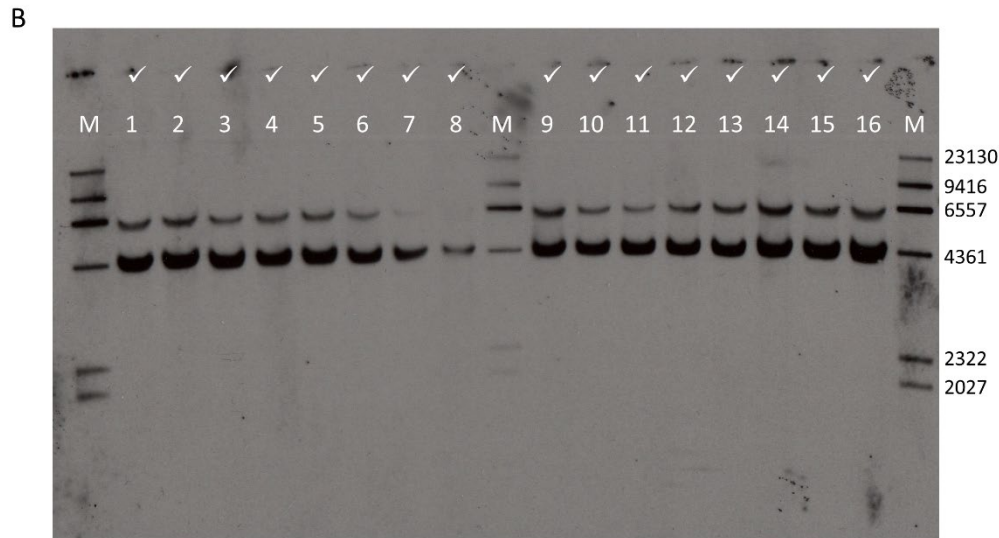

M: marker ✓: correctly resolved

*3xFLAG-Antp* alleles: lanes 1, 2, 3, 4 and 5

*Antp(YPWM→AAAA)* alleles: lanes 6, 10, 12 and 13

*3xFLAG-Antp(YPWM→AAAA)* alleles: lanes 7, 8, 9, 11, 14, 15 and 16

**Figure 3-figure supplement 2. Southern blot verification of final *Antp* alleles from sequential resolution.**

**A.** Restriction map of the correct final *Antp* alleles. The positions of the relevant restriction sites are indicated, as well as the lengths of relevant restriction fragments. The blue bar shows the region used as the *Antp* 5' Southern blot probe. The expected Southern blot pattern is also indicated. This schematic is not drawn to scale.

**B.** Southern blot results for 16 selected final alleles. The genotype of each alleles is shown below the blot and all alleles are balanced or are segregating a balancer chromosome. All alleles on this blot show the expected pattern. Lanes 7 and 8 both had the correct patterns; the weak large molecular weight bands were confirmed by prolonged exposure (**not shown**).

**A Crosses for simultaneous resolution (chromosome II)**

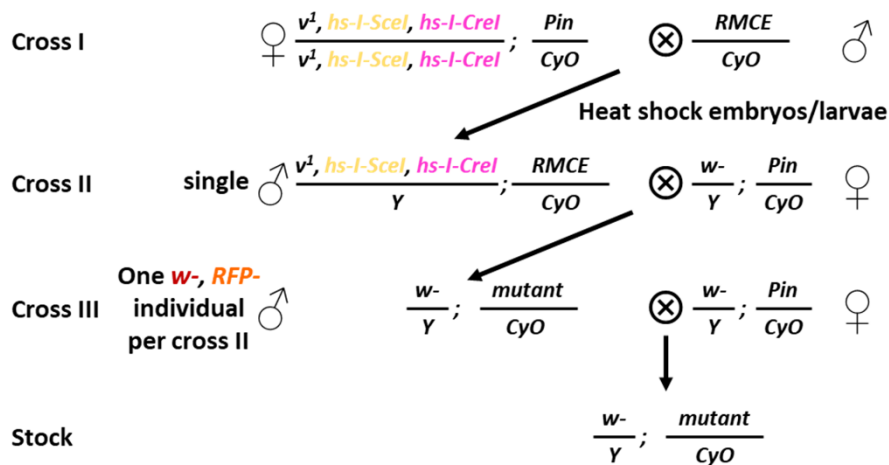

**B Crosses for simultaneous resolution (chromosome X)**

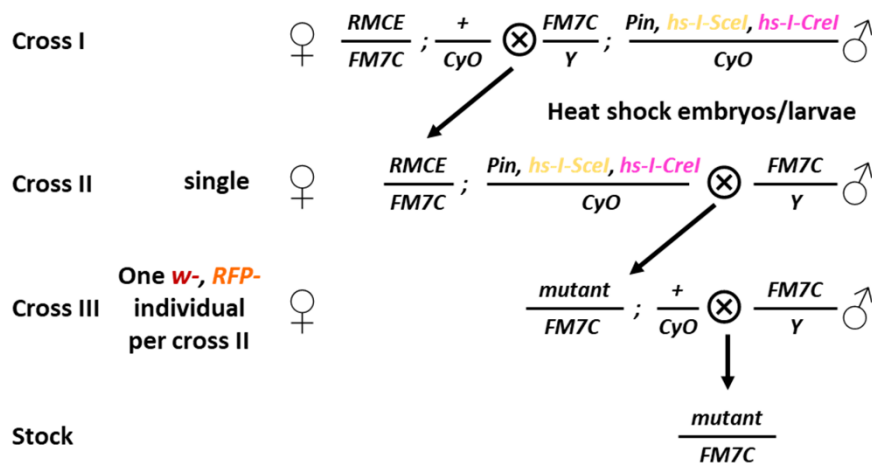

921

922 **Figure 4-figure supplement 1. Crosses for the simultaneous resolution of second and X chromosome RMCE**  
 923 **alleles.**

924 **A.** Crosses for simultaneously resolving RMCE alleles on chromosome II.

925 **B.** Crosses for the simultaneous resolution of X chromosome RMCE alleles.

926

927

928

929

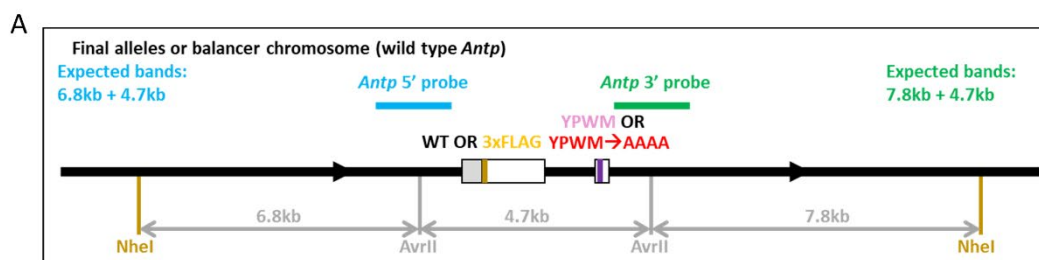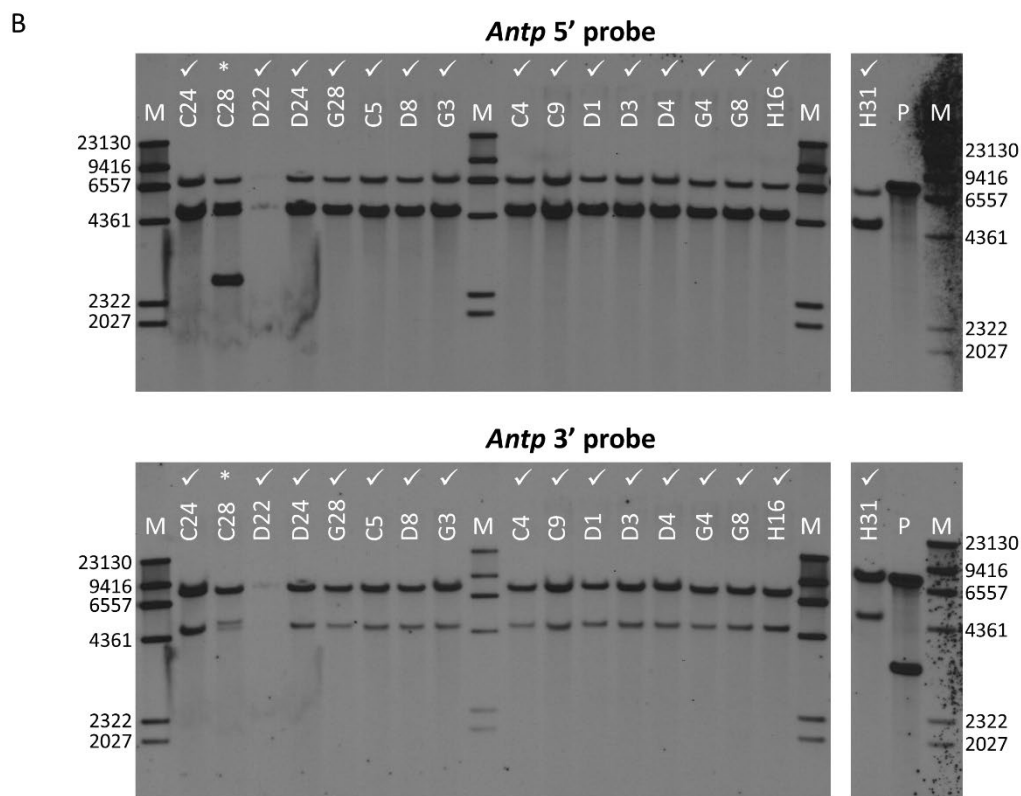

M: marker P: positive control ✓: correctly resolved \*: unexpected pattern

*3xFLAG-Antp* alleles: C25, C28, D22, D24, G28, H16 and H31

*Antp*(YPWM → AAAAA) alleles: C5, D8 and G3

*3xFLAG-Antp*(YPWM → AAAAA) alleles: C4, C9, D1, D3, D4, G4 and G8

930

931 **Figure 4-figure supplement 2. Southern blot verification of final alleles from the simultaneous resolution of**  
 932 ***3xFLAG-Antp* RMCE alleles.**

933 **A.** Restriction map of the correct final alleles. The positions of relevant restriction sites, and the lengths of relevant  
 934 restriction fragments are shown. The blue and green bars indicate the regions used as *Antp* 5' and *Antp* 3' Southern blot  
 935 probes. The expected Southern blot patterns from each probe are also shown. This schematic is not drawn to scale.

936 **B.** Southern blot results of selected final alleles. The genotype of each allele is shown below the blots, and all alleles are  
 937 balanced with or are segregating a balancer chromosome. The letter in the name of a final allele indicates the original  
 938 RMCE line from which this allele was derived. Other than C28, all alleles show the correct pattern. D22 had weak signal,  
 939 but its correct pattern was confirmed by prolonged exposure (not shown). The positive control is restriction digested  
 940 plasmid with a fragment from *Antp*.



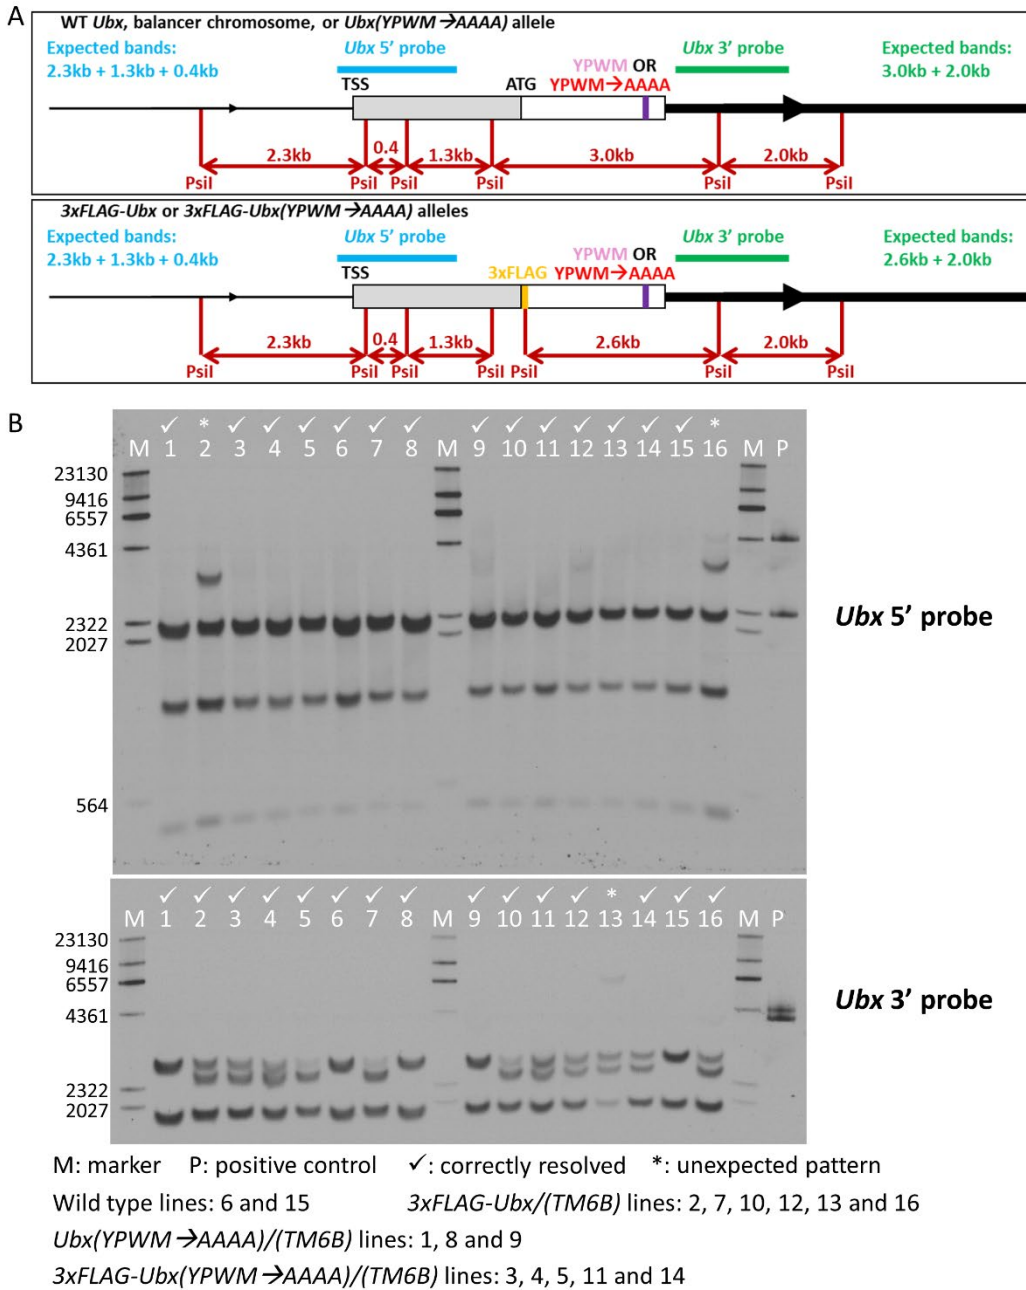

941

942

**Figure 5-figure supplement 1. Southern blot verification of selected final *Ubx* alleles.**

943

**A.** Restriction maps of final *Ubx* alleles. The positions of relevant restriction sites are shown, as well as the sizes of the relevant restriction fragments. The blue and green bars indicate regions used as the *Ubx* 5' and *Ubx* 3' probes. The expected Southern blot patterns for each probe are shown. The schematics are not drawn to scale.

946

**B.** Southern blot results of selected final *Ubx* alleles. The genotype of each sample is shown below the blots. All lines might be segregating a balancer chromosome. Lanes 2, 13 and 16 each showed an extra band, indicating additional rearrangement(s). The positive control is restriction digested plasmid with a fragment from *Ubx*.

949

950

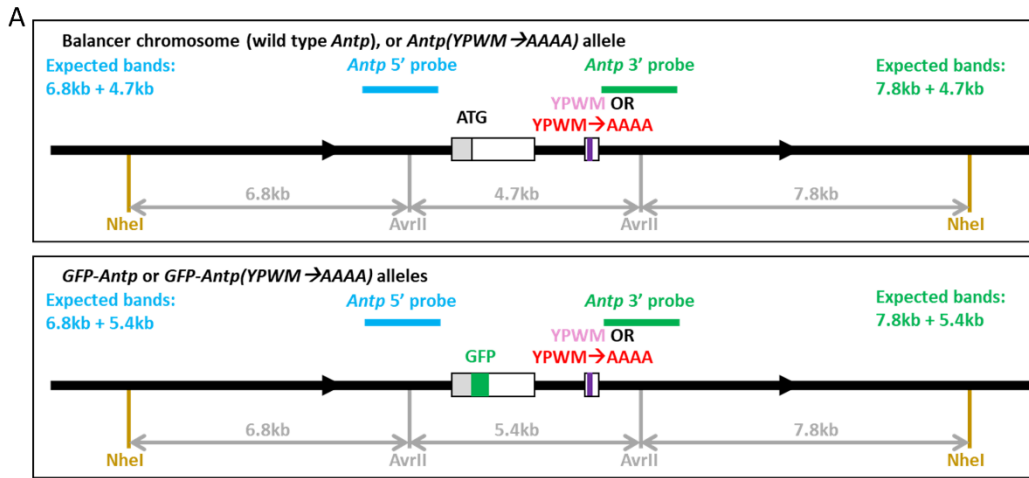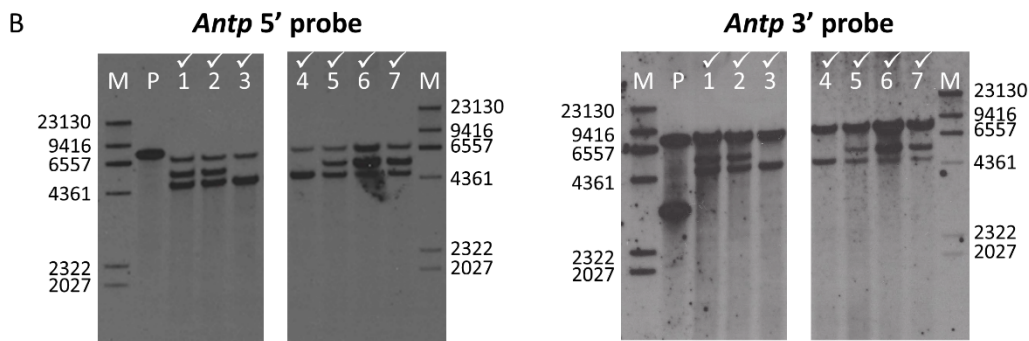

M: marker    P: positive control                      ✓: correctly resolved

*GFP-Antp*/*TM6B* lines: 6 and 7

*Antp*(YPWM→AAAA)/*TM6B* lines: 3 and 4

*GFP-Antp*(YPWM→AAAA)/*TM6B* lines: 1, 2 and 5

951

952

**Figure 6-figure supplement 1. Southern blot verification of selected *GFP-Antp* targeting final alleles.**

953

**A.** Restriction maps of various genotypes. The positions of the relevant restriction sites are indicated, and the lengths of the relevant restriction fragments are also shown. The blue and green bars show the regions used as *Antp* 5' and *Antp* 3' Southern blot probes. The expected patterns from each probe are indicated. These schematics are not drawn to scale.

956

**B.** Southern blot results of selected final *GFP-Antp* targeting alleles. The genotype of each sample is indicated below the blots. All of these alleles give correct patterns. The positive control is restriction digested plasmid with a fragment from *Antp*.

959

960

961

962

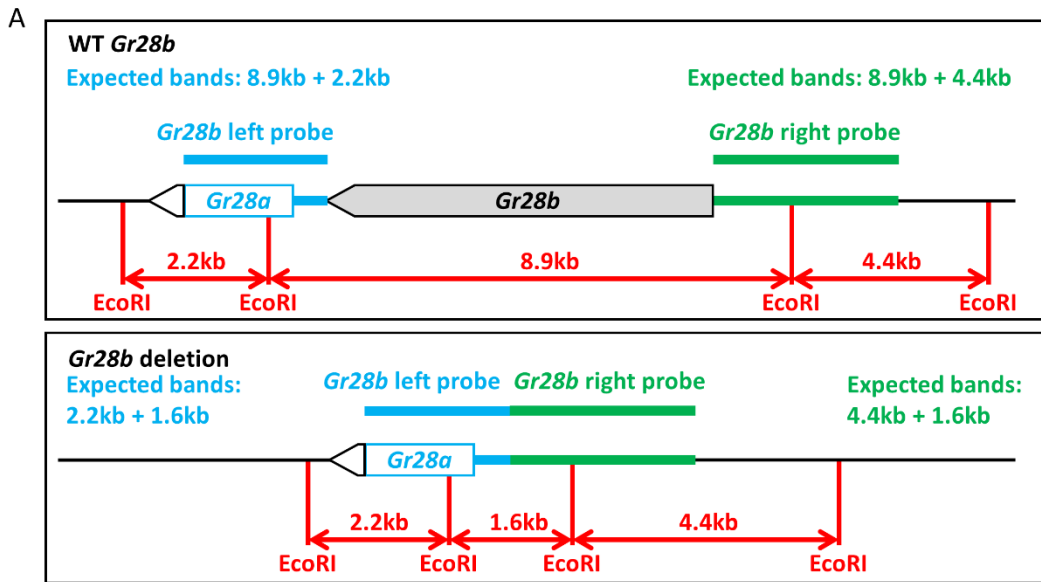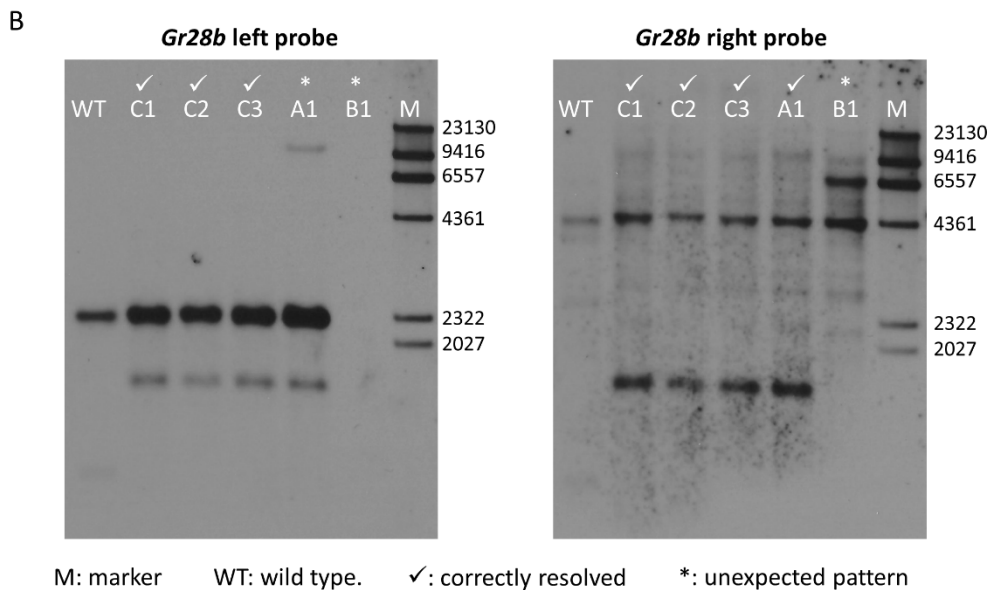

963

964

**Figure 7-figure supplement 1. Southern blot verification of selected *Gr28b* deletion alleles.**

965

966

967

968

**A.** Restriction maps of the wild type *Gr28b* allele and the *Gr28b* deletion allele. The positions of relevant restriction sites, as well as the lengths of relevant restriction fragments, are shown. The blue and green bars indicate the regions used as the *Gr28b* left and *Gr28b* right Southern blot probes. The expected patterns from each probe are also shown. Not drawn to scale.

969

970

971

972

973

**B.** Southern blot results of 5 selected final *Gr28b* deletion alleles. Genomic DNA was extracted from homozygous flies for all samples. For the wild type control, the 8.9 kb band is probably too weak to be visible. Alleles C1, C2 and C3 are correct. Allele A1 has an extra band when probed with the *Gr28b* left probe. Allele B1 does not show any signal when probed with the *Gr28b* left probe, indicating sequences homologous to this probe are absent. The additional weak bands visible in the blot probed with *Gr28b* right probe may be due to repetitive sequences in the probe.

974

## References

- 975  
976 ABREU-BLANCO, M. T., VERBOON, J. M., LIU, R., WATTS, J. J. & PARKHURST, S. M. 2012.  
977 &lt;em>Drosophila</em> embryos close epithelial wounds using a combination of cellular protrusions  
978 and an actomyosin purse string. *Journal of Cell Science*, 125, 5984.
- 979 BAROLO, S., CARVER, L. A. & POSAKONY, J. W. 2000. GFP and  $\beta$ -Galactosidase Transformation Vectors for  
980 Promoter/Enhancer Analysis in *Drosophila*. *BioTechniques*, 29, 726-732.
- 981 BATEMAN, J. R., LEE, A. M. & WU, C. T. 2006. Site-specific transformation of *Drosophila* via phiC31 integrase-mediated  
982 cassette exchange. *Genetics*, 173, 769-777.
- 983 BELLAICHE, Y., MOGILA, V. & PERRIMON, N. 1999. I-*Scel* Endonuclease, a New Tool for Studying  
984 DNA Double-Strand Break Repair Mechanisms in *Drosophila*. *Genetics*, 152, 1037.
- 985 BISCHOF, J., MAEDA, R. K., HEDIGER, M., KARCH, F. & BASLER, K. 2007. An optimized transgenesis system for  
986 *Drosophila* using germ-line-specific  $\phi$ C31 integrases. *Proceedings of the National*  
987 *Academy of Sciences*, 104, 3312.
- 988 BRAND, A. H. & PERRIMON, N. 1993. Targeted gene expression as a means of altering cell fates and generating dominant  
989 phenotypes. *Development*, 118, 401.
- 990 DELKER, R. K., RANADEV, V., LOKER, R., VOUTEV, R. & MANN, R. S. 2019. Low affinity binding sites in an activating CRM  
991 mediate negative autoregulation of the *Drosophila* Hox gene Ultrabithorax. *PLOS Genetics*, 15, e1008444.
- 992 GAO, G., MCMAHON, C., CHEN, J. & RONG, Y. S. 2008. A powerful method combining homologous recombination and  
993 site-specific recombination for targeted mutagenesis in *Drosophila*. *Proceedings of the*  
994 *National Academy of Sciences*, 105, 13999.
- 995 GRATZ, S. J., UKKEN, F. P., RUBINSTEIN, C. D., THIEDE, G., DONOHUE, L. K., CUMMINGS, A. M. & O'CONNOR-GILES, K. M.  
996 2014. Highly Specific and Efficient CRISPR/Cas9-Catalyzed Homology-Directed Repair in  
997 *Drosophila*. *Genetics*, 196, 961.
- 998 HANDLER, A. M. & HARRELL, R. A. 1999. Germline transformation of *Drosophila melanogaster* with the piggyBac  
999 transposon vector. *Insect Molecular Biology*, 8, 449-457.
- 000 HANDLER, A. M. & HARRELL, R. A. 2001. Polyubiquitin-regulated DsRed marker for transgenic insects. *BioTechniques*, 31,  
001 820, 824-8.
- 002 HORN, C. & HANDLER, A. M. 2005. Site-specific genomic targeting in *Drosophila*. *Proceedings of*  
003 *the National Academy of Sciences of the United States of America*, 102, 12483.
- 004 HORN, C., JAUNICH, B. & WIMMER, E. A. 2000. Highly sensitive, fluorescent transformation marker for *Drosophila*  
005 transgenesis. *Development Genes and Evolution*, 210, 623-629.
- 006 HOSKINS, R. A., CARLSON, J. W., WAN, K. H., PARK, S., MENDEZ, I., GALLE, S. E., BOOTH, B. W., PFEIFFER, B. D., GEORGE,  
007 R. A., SVIRSKAS, R., KRZYWINSKI, M., SCHEIN, J., ACCARDO, M. C., DAMIA, E., MESSINA, G., MÉNDEZ-LAGO, M.,  
008 DE PABLOS, B., DEMAKOVA, O. V., ANDREYEVA, E. N., BOLDYREVA, L. V., MARRA, M., CARVALHO, A. B., DIMITRI,

- 009 P., VILLASANTE, A., ZHIMULEV, I. F., RUBIN, G. M., KARPEN, G. H. & CELNIKER, S. E. 2015. The Release 6  
010 reference sequence of the *Drosophila melanogaster* genome. *25*, 445-458.
- 011 KANCA, O., ZIRIN, J., GARCIA-MARQUES, J., KNIGHT, S. M., YANG-ZHOU, D., AMADOR, G., CHUNG, H., ZUO, Z., MA, L., HE,  
012 Y., LIN, W.-W., FANG, Y., GE, M., YAMAMOTO, S., SCHULZE, K. L., HU, Y., SPRADLING, A. C., MOHR, S. E.,  
013 PERRIMON, N. & BELLEN, H. J. 2019. An efficient CRISPR-based strategy to insert small and large fragments of  
014 DNA using short homology arms. *eLife*, *8*, e51539.
- 015 LEE, P.-T., ZIRIN, J., KANCA, O., LIN, W.-W., SCHULZE, K. L., LI-KROEGER, D., TAO, R., DEVEREAUX, C., HU, Y., CHUNG, V.,  
016 FANG, Y., HE, Y., PAN, H., GE, M., ZUO, Z., HOUSDEN, B. E., MOHR, S. E., YAMAMOTO, S., LEVIS, R. W.,  
017 SPRADLING, A. C., PERRIMON, N. & BELLEN, H. J. 2018. A gene-specific T2A-GAL4 library for *Drosophila*. *eLife*, *7*,  
018 e35574.
- 019 LELLI, K. M., NORO, B. & MANN, R. S. 2011. Variable motif utilization in homeotic selector (Hox)-cofactor complex  
020 formation controls specificity. *Proc Natl Acad Sci U S A*, *108*, 21122-7.
- 021 MANN, R. S., LELLI, K. M. & JOSHI, R. 2009. Hox specificity unique roles for cofactors and collaborators. *Current topics in*  
022 *developmental biology*, *88*, 63-101.
- 023 MERABET, S. & MANN, R. S. 2016. To Be Specific or Not: The Critical Relationship Between Hox And TALE Proteins.  
024 *Trends Genet*, *32*, 334-347.
- 025 MERABET, S., SAADAOUI, M., SAMBRANI, N., HUDRY, B., PRADEL, J., AFFOLTER, M. & GRABA, Y. 2007. A unique  
026 Extradenticle recruitment mode in the <em>*Drosophila*</em> Hox protein Ultrabithorax. *Proceedings*  
027 *of the National Academy of Sciences*, *104*, 16946.
- 028 NAGARKAR-JAISWAL, S., LEE, P.-T., CAMPBELL, M. E., CHEN, K., ANGUIANO-ZARATE, S., CANTU GUTIERREZ, M., BUSBY,  
029 T., LIN, W.-W., HE, Y., SCHULZE, K. L., BOOTH, B. W., EVANS-HOLM, M., VENKEN, K. J. T., LEVIS, R. W.,  
030 SPRADLING, A. C., HOSKINS, R. A. & BELLEN, H. J. 2015. A library of MiMICs allows tagging of genes and  
031 reversible, spatial and temporal knockdown of proteins in *Drosophila*. *eLife*, *4*, e05338.
- 032 NI, L., BRONK, P., CHANG, E. C., LOWELL, A. M., FLAM, J. O., PANZANO, V. C., THEOBALD, D. L., GRIFFITH, L. C. & GARRITY,  
033 P. A. 2013. A gustatory receptor paralogue controls rapid warmth avoidance in *Drosophila*. *Nature*, *500*, 580-  
034 584.
- 035 PORT, F., MUSCHALIK, N. & BULLOCK, S. L. 2015. Systematic Evaluation of <em>*Drosophila*</em> CRISPR  
036 Tools Reveals Safe and Robust Alternatives to Autonomous Gene Drives in Basic Research. *G3:*  
037 *Genes/Genomes/Genetics*, *5*, 1493.
- 038 RONG, Y. S., TITEN, S. W., XIE, H. B., GOLIC, M. M., BASTIANI, M., BANDYOPADHYAY, P., OLIVERA, B. M., BRODSKY, M.,  
039 RUBIN, G. M. & GOLIC, K. G. 2002. Targeted mutagenesis by homologous recombination in *D. melanogaster*.  
040 *Genes Dev*, *16*, 1568-1581.
- 041 SANG, J., RIMAL, S. & LEE, Y. 2019. Gustatory receptor 28b is necessary for avoiding saponin in *Drosophila melanogaster*.  
042 *EMBO reports*, *20*, e47328.
- 043 THUMMEL, C. S., BOULET, A. M. & LIPSHITZ, H. D. 1988. Vectors for *Drosophila* P-element-mediated transformation and  
044 tissue culture transfection. *Gene*, *74*, 445-456.

- 045 VENKEN, K. J. T., SCHULZE, K. L., HAELTERMAN, N. A., PAN, H., HE, Y., EVANS-HOLM, M., CARLSON, J. W., LEVIS, R. W.,  
046 SPRADLING, A. C., HOSKINS, R. A. & BELLEN, H. J. 2011. MiMIC: a highly versatile transposon insertion resource  
047 for engineering *Drosophila melanogaster* genes. *Nature Methods*, 8, 737-743.
- 048 VILAIN, S., VANHAUWAERT, R., MAES, I., SCHOOVAERTS, N., ZHOU, L., SOUKUP, S., DA CUNHA, R., LAUWERS, E., FIERS,  
049 M. & VERSTREKEN, P. 2014. Fast and Efficient *Drosophila melanogaster* Gene Knock-Ins  
050 Using MiMIC Transposons. *G3: Genes/Genomes/Genetics*, 4, 2381.
- 051 WESOLOWSKA, N. & RONG, Y. S. 2013. Long-Range Targeted Manipulation of the *Drosophila*  
052 Genome by Site-Specific Integration and Recombinational Resolution. *Genetics*, 193, 411.
- 053 ZOLOTAREV, N., GEORGIEV, P. & MAKSIMENKO, O. 2019. Removal of extra sequences with I-SceI in combination with  
054 CRISPR/Cas9 technique for precise gene editing in *Drosophila*. *BioTechniques*, 66, 198-201.
- 055
